# Supplementary material for: Identifying images in the biology literature that are problematic for people with a color-vision deficiency
Source: bioRxiv preprint, doi:10.1101/2023.11.29.569308, version 2 (2024-06-29)
Supplement: Additional Data File 1 [file 569308_file04.xlsx]

## Sheet: 1-5000
Image Names	visually detect problem colors (Shades of red, green, and orange)	Contrasts mitigate problem	Labels mitigate problem	Distance mitigates problem	Conclusion (5 types listed in drop down)	Notes
elife-00160-fig1-v1.jpg	TRUE	N	N	N	Definitely problematic	Figures C/F are problematic because of the red/green overlay
elife-00183-fig8-v1.jpg	TRUE	N	N	N	Definitely problematic	All figures except E are problematic because of the red/green overlay
elife-00184-fig3-v1.jpg	TRUE	N	N	N	Definitely problematic	Hard to distringuish the ligand; and protein quatenary structure is too similar
elife-00306-fig4-v1.jpg	TRUE	Y	Y	N	Probably okay	The labels and shading of the nucelotides overcome the red/green colors
elife-00333-fig2-v1.jpg	FALSE				Definitely okay
elife-00378-fig1-v1.jpg	TRUE	N	N	N	Definitely problematic	Overlaying red/green. Labels with arrows are hard to understand
elife-00592-fig9-v1.jpg	TRUE	Y	N	Y	Probably okay	Label unclear; shading could be darker
elife-00603-fig4-v1.jpg	TRUE	Y	N	N	Probably okay	The heatmap has enough shading to tell the colors apart
elife-00647-fig2-v1.jpg	FALSE				Gray-scale
elife-00762-fig1-v1.jpg	TRUE	Y	Y	N	Definitely okay
elife-00782-fig4-v1.jpg	TRUE	Y	Y	N	Probably okay	In the line graphs, the distance between the lines is a concern
elife-00800-fig4-v1.jpg	FALSE				Definitely okay
elife-00808-fig1-v1.jpg	TRUE	Y	Y	Y	Definitely okay
elife-00882-fig9-v1.jpg	FALSE				Gray-scale
elife-00926-fig1-v1.jpg	FALSE				Gray-scale
elife-00947-fig7-v1.jpg	FALSE				Definitely okay
elife-00966-fig2-v1.jpg	TRUE	N	Y	Y	Probably okay	The contrast between T and A nucleotides is lacking, but the distance betweent them and the labels overcome that.
elife-00967-fig1-v1.jpg	TRUE	N	N	N	Definitely problematic
elife-01071-fig2-v1.jpg	TRUE	Y	N	N	Probably problematic
elife-01085-fig11-v1.jpg	TRUE	Y	Y	Y	Definitely okay
elife-01102-fig8-v1.jpg	FALSE				Gray-scale
elife-01119-fig2-v1.jpg	FALSE				Gray-scale
elife-01201-fig4-v2.jpg	TRUE	N	N	N	Definitely problematic	MAP2/PTBP2/DAPI overlay is hard to decipher.
elife-01201-fig8-v1.jpg	FALSE				Definitely okay
elife-01239-fig7-v1.jpg	TRUE	Y	N	N	Probably okay	This image uses red to yellow gradient which may be difficult to decipher, but the contrast and lables are clear
elife-01287-fig8-v1.jpg	TRUE	Y	Y	N	Definitely okay
elife-01308-fig7-v1.jpg	TRUE	Y	Y	Y	Definitely okay
elife-01323-fig2-v1.jpg	FALSE				Definitely okay
elife-01438-fig7-v1.jpg	FALSE	Y	Y	N	Probably okay	In the deut. line graph, the contrast with the red is hard to see. One needs to zoom in to see the difference.
elife-01462-fig5-v1.jpg	FALSE				Definitely okay
elife-01473-fig4-v1.jpg	TRUE	Y	Y	Y	Definitely okay
elife-01479-fig1-v1.jpg	TRUE	N	N	Y	Probably problematic	Figure B contains red and green near eachother, but the contrast helps. The yellow and green howver in the legend are too similar.
elife-01574-fig2-v1.jpg	FALSE	Y	N	N	Definitely okay
elife-01574-fig8-v1.jpg	FALSE				Gray-scale
elife-01581-fig2-v1.jpg	FALSE				Gray-scale
elife-01630-fig11-v1.jpg	FALSE	Y	Y	Y	Definitely okay
elife-01695-fig8-v1.jpg	TRUE	Y	Y	Y	Definitely okay
elife-01808-fig9-v1.jpg	TRUE	N	N	N	Definitely problematic	Figure B has red/green overlay.
elife-01832-fig6-v1.jpg	FALSE				Definitely okay
elife-01846-fig4-v1.jpg	TRUE	N	N	N	Definitely problematic
elife-01883-fig9-v1.jpg	FALSE				Gray-scale
elife-01906-fig5-v1.jpg	TRUE	N	N	N	Definitely problematic	Figures with red and green overlay are likely problematic (A, H,I, Q...etc)
elife-01958-fig6-v1.jpg	TRUE	Y	N	Y	Definitely okay
elife-01963-fig11-v1.jpg	TRUE	Y	Y	N	Definitely okay
elife-01998-fig3-v1.jpg	TRUE	Y	N	N	Probably problematic	The use of colors in the protein without labels makes it hard to decipher the meaning. However, there is some contrast
elife-02020-fig1-v1.jpg	TRUE	Y	Y	Y	Definitely okay	While there is green (in the background of one image) and red, they are in different figures.
elife-02077-fig1-v1.jpg	TRUE	N	N	N	Definitely problematic
elife-02077-fig7-v1.jpg	FALSE	Y			Definitely okay
elife-02109-fig1-v1.jpg	FALSE				Definitely okay
elife-02370-fig1-v1.jpg	TRUE	Y	Y	N	Probably okay	Uses a heatmap with clear labels and contrast, but the colors are overlapping.
elife-02370-fig4-v1.jpg	FALSE				Gray-scale
elife-02372-fig2-v3.jpg	TRUE	N	N	N	Definitely problematic
elife-02525-fig3-v2.jpg	FALSE				Gray-scale
elife-02663-fig5-v1.jpg	TRUE	Y	N	Y	Probably okay	In figure C, the axon and apical dendrite may be hard to distinguish, but there is high contrast between them.
elife-02667-fig7-v1.jpg	FALSE				Definitely okay
elife-02772-fig2-v2.jpg	TRUE	Y	NA	N	Definitely okay	The amino acid codes have very differnet contrasts.
elife-02780-fig2-v2.jpg	FALSE				Gray-scale
elife-02780-fig7-v2.jpg	TRUE	N	N	N	Definitely problematic	Figure C has overlay between red/green.
elife-02863-fig6-v1.jpg	FALSE				Definitely okay
elife-02866-fig4-v1.jpg	TRUE	Y	N	Y	Probably okay	It is unclear what each color refers to, but the contrast is sufficent.
elife-02923-fig1-v2.jpg	FALSE				Definitely okay
elife-03110-fig1-v1.jpg	TRUE	Y	N	N	Probably okay	Figure B has a heatmap without a label, but is overcome by high constrast.
elife-03191-fig8-v2.jpg	TRUE	Y	Y	Y	Definitely okay
elife-03198-fig2-v2.jpg	TRUE	N	N	N	Definitely problematic
elife-03198-fig4-v4.jpg	FALSE				Definitely okay
elife-03256-fig3-v2.jpg	TRUE	Y	Y	N	Definitely okay
elife-03307-fig1-v3.jpg	TRUE	Y	Y	Y	Definitely okay
elife-03383-fig7-v3.jpg	TRUE	N	N	N	Definitely problematic	Figure F, H, I have red/green overlay
elife-03405-fig8-v1.jpg	TRUE	Y	N	N	Probably okay	High contrast overcomes lack of good labels and proximity of lines in the line graphs.
elife-03422-fig1-v1.jpg	FALSE				Definitely okay
elife-03498-fig8-v1.jpg	TRUE	Y	N	N	Probably problematic	Even though can see the contrast of red-green color, there is no labels and very close proximity would make it hard to know what's being shown
elife-03522-fig7-v1.jpg	FALSE				Definitely okay
elife-03549-fig7-v1.jpg	TRUE	Y	Y	Y	Definitely okay
elife-03579-fig1-v3.jpg	TRUE	N	N	N	Definitely problematic
elife-03581-fig3-v2.jpg	FALSE				Gray-scale
elife-03604-fig6-v2.jpg	TRUE	Y	N	Y	Probably okay	One potential issue could be the lack of clear labels, but there is enough contrast.
elife-03635-fig1-v2.jpg	TRUE	N	N	N	Definitely problematic	The labels are insufficent, and the close proximity of the lines makes it near impossible to understand the graph.
elife-03640-fig6-v2.jpg	TRUE	N	N	N	Definitely problematic	Right-most column has red/green overlay.
elife-03680-fig4-v3.jpg	TRUE	N	Y	N	Probably problematic	The contrast is not enough between the greens in Figure D.
elife-03726-fig8-v1.jpg	FALSE				Definitely okay
elife-03764-fig2-v1.jpg	FALSE				Definitely okay
elife-03848-fig5-v2.jpg	FALSE				Definitely okay
elife-03851-fig2-v2.jpg	FALSE	Y	Y	Y	Definitely okay
elife-03915-fig7-v2.jpg	TRUE	N	N	N	Definitely problematic	Red/green overlay in third col; Figs A & D
elife-03941-fig7-v2.jpg	TRUE	Y	Y	N	Probably okay	The red and greeen have enough contrast, but they are right next to each other, which might make it harder.
elife-03949-fig2-v2.jpg	FALSE				Definitely okay
elife-03971-fig3-v2.jpg	TRUE	Y	Y	Y	Definitely okay
elife-04046-fig4-v3.jpg	TRUE	N	N	N	Definitely problematic	Red/green overlay.
elife-04066-fig5-v2.jpg	FALSE				Gray-scale
elife-04094-fig5-v2.jpg	TRUE	Y	Y	N	Definitely okay	Heatmap has red/green, but it has a good label and contrast which overcomes the issue.
elife-04111-fig7-v1.jpg	FALSE				Definitely okay
elife-04114-fig4-v2.jpg	TRUE	Y	N	Y	Probably okay	In simulated image, the labels are harder to read because of the contrast.
elife-04126-fig4-v5.jpg	TRUE	Y	Y	N	Probably okay	Contains red and green, but they are labeled well.
elife-04132-fig2-v3.jpg	TRUE	N	N	N	Definitely problematic	Red/green overlay
elife-04132-fig3-v2.jpg	TRUE	N	N	N	Definitely problematic	Red/green overlay
elife-04236-fig5-v1.jpg	TRUE	Y	N	Y	Probably okay
elife-04251-fig8-v1.jpg	TRUE	N	N	N	Definitely problematic	Red/green overlay on the bottom.
elife-04260-fig8-v2.jpg	TRUE	Y	N	Y	Probably okay	While there is red/green, they are in different figures
elife-04346-fig5-v1.jpg	TRUE	Y	N	N	Probably problematic	The line graphs have red and green without great contrast, but the distance helps.
elife-04378-fig5-v2.jpg	TRUE	Y	NA	Y	Definitely okay
elife-04407-fig2-v2.jpg	TRUE	Y	N	N	Probably okay	Contains a red arrow near a green circle, but those are clearly different shapes.
elife-04551-fig2-v2.jpg	FALSE				Definitely okay
elife-04581-fig6-v2.jpg	TRUE	N	N	N	Definitely problematic
elife-04585-fig3-v3.jpg	FALSE				Definitely okay
elife-04677-fig5-v1.jpg	FALSE				Definitely okay
elife-04801-fig5-v1.jpg	TRUE	N	N	N	Definitely problematic
elife-04885-fig1-v2.jpg	TRUE	Y	N	N	Probably okay	Altough this image contains reds and greens, most are in different figures, and the limited overlap has clear contrast.
elife-04889-fig14-v1.jpg	TRUE	N	N	N	Definitely problematic
elife-04960-fig2-v2.jpg	TRUE	N	N	N	Definitely problematic	In A, B, and C it is impossible to distinguish the red and green dots.
elife-04986-fig6-v1.jpg	FALSE				Definitely okay
elife-05061-fig6-v1.jpg	FALSE				Definitely okay
elife-05154-fig4-v1.jpg	FALSE				Definitely okay
elife-05165-fig6-v2.jpg	FALSE	N			Probably okay	The red circle with purple in it may be hard to see due to contrast, but it is overall still a readable figure.
elife-05289-fig7-v1.jpg	TRUE	Y	N	N	Probably okay
elife-05397-fig4-v1.jpg	TRUE	Y	N	N	Probably problematic	The lack of labelling overcomes the contrast.
elife-05438-fig1-v1.jpg	TRUE	N	N	N	Definitely problematic	Contains red/green overlay in one figure.
elife-05464-fig1-v2.jpg	TRUE	Y	Y	Y	Definitely okay
elife-05503-fig6-v2.jpg	FALSE	N	Y	Y	Probably okay	Red-Green does not present any issues. The pink and blue labels become very close shade of light blue that may be hard to tell apart
elife-06029-fig1-v2.jpg	FALSE				Definitely okay
elife-06029-fig9-v2.jpg	TRUE	N	N	N	Definitely problematic	Red/green overlay
elife-06114-fig3-v1.jpg	TRUE	Y	N	Y	Definitely okay	Red and green are in different figures.
elife-06120-fig7-v2.jpg	TRUE	Y	Y	Y	Definitely okay
elife-06166-fig2-v2.jpg	TRUE	N	N	N	Definitely problematic	See figure A' with overlay between green/red.
elife-06179-fig3-v2.jpg	TRUE	Y	Y	N	Definitely okay
elife-06229-fig4-v2.jpg	FALSE				Definitely okay
elife-06249-fig4-v1.jpg	TRUE	Y	Y	N	Probably okay	The red and green are near eachother, but there is enough contrast and good labeling to tell the difference.
elife-06265-fig4-v1.jpg	TRUE	N	N	N	Definitely problematic	Overlay of red and green.
elife-06322-fig1-v1.jpg	TRUE	Y	Y	N	Definitely okay	Sanger sequencing overcome color similarity
elife-06322-fig5-v1.jpg	TRUE	Y	Y	N	Probably okay	Sanger sequencing labels help, but the peaks are very close.
elife-06359-fig6-v1.jpg	TRUE	N	Y	Y	Probably okay	The labelling on the protein helps differentiate the colors.
elife-06498-fig3-v3.jpg	FALSE				Definitely okay
elife-06505-fig5-v2.jpg	FALSE				Gray-scale
elife-06516-fig2-v2.jpg	TRUE	Y	Y	Y	Definitely okay
elife-06545-fig8-v2.jpg	FALSE				Definitely okay
elife-06602-fig2-v2.jpg	FALSE				Gray-scale
elife-06744-fig5-v2.jpg	TRUE	Y	Y	Y	Definitely okay
elife-06807-fig5-v1.jpg	TRUE	N	Y	N	Definitely problematic	Overlayed image, A-C
elife-06807-fig6-v1.jpg	TRUE	N	N	N	Definitely problematic	Overlay
elife-06930-fig4-v1.jpg	TRUE	Y	Y	Y	Definitely okay
elife-07025-fig2-v2.jpg	FALSE				Definitely okay
elife-07187-fig3-v2.jpg	TRUE	N	N	N	Definitely problematic
elife-07192-fig7-v1.jpg	TRUE	Y	NA	N	Probably okay	Heatmap linegraph has rainbow scale. The close proximity could be an isuse, but the contrast helps.
elife-07266-fig4-v1.jpg	FALSE				Definitely okay
elife-07398-fig1-v3.jpg	FALSE				Definitely okay
elife-07485-fig1-v3.jpg	TRUE	N	N	N	Probably problematic	A very small area has a overlap at the end of Figure C.
elife-07596-fig4-v3.jpg	TRUE	Y	N	N	Probably okay	The contrast between green and orange is sufficent.
elife-07777-fig4-v2.jpg	TRUE	Y	Y	Y	Definitely okay
elife-07836-fig7-v3.jpg	TRUE	Y	Y	Y	Definitely okay
elife-07864-fig5-v2.jpg	TRUE	Y	Y	Y	Definitely okay
elife-07871-fig2-v1.jpg	FALSE				Gray-scale
elife-07918-fig6-v1.jpg	FALSE				Definitely okay
elife-07966-fig6-v2.jpg	TRUE	Y	N	N	Probably okay	The high contrast overcomes the close distance of the scatterplot.
elife-07969-fig3-v2.jpg	FALSE				Definitely okay
elife-08007-fig4-v2.jpg	TRUE	N	Y	N	Probably problematic	Figure D doesn't have enough contrast, but the labels mitigate it. Fig A has contrast with the heatmap.
elife-08088-fig2-v2.jpg	FALSE				Gray-scale
elife-08127-fig6-v1.jpg	TRUE	Y	Y	N	Definitely okay
elife-08142-fig1-v2.jpg	TRUE	Y	Y	Y	Definitely okay
elife-08261-fig1-v2.jpg	TRUE	N	N	N	Definitely problematic	Figure B and A have green/red overlay.
elife-08351-fig5-v1.jpg	TRUE	Y	Y	Y	Definitely okay
elife-08362-fig1-v2.jpg	FALSE				Definitely okay
elife-08363-fig7-v1.jpg	TRUE	Y	Y	Y	Definitely okay
elife-08648-fig1-v1.jpg	TRUE	N	N	N	Definitely problematic
elife-08666-fig4-v2.jpg	TRUE	Y	Y	N	Probably okay	There is overlay in a figure, but they are large enough to see the contrast
elife-08752-fig7-v1.jpg	FALSE				Gray-scale
elife-08758-fig7-v2.jpg	TRUE	N	N	N	Definitely problematic	The issue is between the green and the lime color in the protein
elife-08905-fig6-v2.jpg	TRUE	Y	Y	Y	Definitely okay
elife-08918-fig9-v2.jpg	TRUE	Y	Y	Y	Definitely okay
elife-08928-fig5-v1.jpg	FALSE				Gray-scale
elife-08932-fig3-v3.jpg	TRUE	Y	Y	N	Definitely okay
elife-09017-fig4-v2.jpg	TRUE	Y	Y	Y	Definitely okay
elife-09214-fig6-v2.jpg	FALSE				Definitely okay
elife-09268-fig2-v3.jpg	FALSE				Definitely okay
elife-09269-fig4-v1.jpg	TRUE	Y	N	N	Probably okay	While there is overlay, the high contrast between the green and the red makes Figure 1 readable
elife-09275-fig1-v2.jpg	TRUE	Y	N	N	Probably okay	While there is overlay, the high contrast between the green and the red makes Figure B4 readable
elife-09376-fig2-v1.jpg	TRUE	Y	Y	N	Definitely okay	Differnent shapes for each line helps mitigate the issue.
elife-09376-fig4-v1.jpg	TRUE	Y	Y	N	Definitely okay	Differnent shapes for each line helps mitigate the issue.
elife-09391-fig5-v2.jpg	FALSE				Definitely okay
elife-09540-fig2-v1.jpg	TRUE	N	N	N	Definitely problematic	Overlay
elife-09561-fig2-v1.jpg	TRUE	Y	Y	N	Probably okay	The heatmap labeling helps make the image readable
elife-09561-fig6-v1.jpg	FALSE				Gray-scale
elife-09584-fig7-v1.jpg	FALSE				Definitely okay
elife-09656-fig5-v1.jpg	TRUE	Y	Y	Y	Definitely okay
elife-09672-fig5-v2.jpg	TRUE	Y	N	N	Probably okay	The high contrast makes the line graph understandable
elife-09696-fig8-v2.jpg	TRUE	Y	Y	Y	Definitely okay
elife-10036-fig8-v2.jpg	TRUE	N	N	N	Definitely problematic
elife-10056-fig4-v2.jpg	TRUE	Y	N	Y	Probably okay	While there is one image with red and green, the contrast and distance helps seperate them.
elife-10072-fig1-v2.jpg	FALSE				Gray-scale
elife-10110-fig2-v2.jpg	TRUE	N	Y	Y	Definitely okay	Red and green are in different figures
elife-10130-fig4-v1.jpg	TRUE	N	N	N	Definitely problematic	Overlay
elife-10230-fig8-v2.jpg	TRUE	Y	N	Y	Definitely okay	Red and green are in different sections
elife-10473-fig7-v1.jpg	TRUE	N	N	N	Definitely problematic
elife-10607-fig7-v4.jpg	TRUE	Y	Y	N	Definitely okay
elife-10769-fig2-v1.jpg	TRUE	N	Y	Y	Probably okay	The labels over each slice in the pie chart make it easier to read
elife-10774-fig2-v4.jpg	TRUE	Y	N	Y	Probably okay	The lack of labels over the red and green slightly complicates it.
elife-10809-fig4-v2.jpg	TRUE	Y	N	N	Probably problematic	The overlay has sufficent contrast, but it is still difficult to understand seperate the red/green.
elife-10837-fig4-v2.jpg	TRUE	Y	N	Y	Definitely okay
elife-10856-fig8-v3.jpg	TRUE	Y	Y	Y	Definitely okay
elife-10907-fig4-v1.jpg	FALSE				Definitely okay
elife-10989-fig8-v2.jpg	TRUE	N	N	N	Definitely problematic
elife-11050-fig1-v1.jpg	FALSE				Definitely okay
elife-11324-fig4-v2.jpg	TRUE	Y	Y	Y	Definitely okay
elife-11416-fig3-v2.jpg	FALSE				Definitely okay
elife-11475-fig6-v2.jpg	FALSE				Definitely okay
elife-11611-fig5-v2.jpg	TRUE	Y	N	Y	Probably okay	Distance and contrast make up for the lack of good labels in the line graph.
elife-11614-fig3-v2.jpg	FALSE				Definitely okay
elife-11750-fig3-v1.jpg	FALSE				Definitely okay
elife-11813-fig5-v1.jpg	TRUE	Y	Y	Y	Definitely okay
elife-11862-fig1-v2.jpg	FALSE				Definitely okay
elife-11994-fig4-v2.jpg	FALSE				Definitely okay
elife-12059-fig8-v2.jpg	TRUE	Y	Y	N	Definitely okay
elife-12115-fig3-v1.jpg	FALSE				Definitely okay
elife-12151-fig7-v2.jpg	TRUE	Y	N	N	Probably problematic	While there is good contrast in the overlay, it is not sufficent to make the figure easily readable.
elife-12167-fig4-v2.jpg	TRUE	N	N	N	Definitely problematic
elife-12387-fig6-v2.jpg	TRUE	Y	N	Y	Probably okay	Lack of labels could make it hard, but the clear contrast between red and green helps.
elife-12397-fig7-v2.jpg	FALSE				Definitely okay
elife-12469-fig2-v2.jpg	FALSE				Gray-scale
elife-12577-fig5-v1.jpg	TRUE	Y	Y	N	Definitely okay	Heatmap color scale is fine.
elife-12620-fig5-v1.jpg	FALSE				Definitely okay
elife-12637-fig8-v1.jpg	FALSE				Definitely okay
elife-12821-fig4-v3.jpg	FALSE				Definitely okay
elife-12856-fig1-v3.jpg	TRUE	Y	Y	Y	Definitely okay
elife-13073-fig2-v1.jpg	TRUE	Y	N	Y	Definitely okay	Reds and greens are in different boxes.
elife-13253-fig1-v2.jpg	TRUE	N	N	N	Definitely problematic	The overlay in F is hard to distinguish
elife-13253-fig7-v2.jpg	TRUE	Y	Y	N	Probably okay	The contrast in the heatmap is sufficent.
elife-13308-fig2-v1.jpg	FALSE				Definitely okay
elife-13378-fig3-v3.jpg	TRUE	Y	Y	Y	Definitely okay
elife-13424-fig6-v2.jpg	FALSE				Definitely okay
elife-13463-fig6-v2.jpg	FALSE				Definitely okay
elife-13546-fig2-v2.jpg	TRUE	Y	Y	Y	Definitely okay
elife-13571-fig1-v3.jpg	TRUE	N	N	N	Definitely problematic
elife-13614-fig6-v2.jpg	FALSE				Gray-scale
elife-13764-fig8-v1.jpg	TRUE	N	N	N	Definitely problematic	Overlay in C
elife-13768-fig6-v1.jpg	TRUE	Y	Y	Y	Definitely okay
elife-13799-fig4-v2.jpg	FALSE				Definitely okay
elife-13905-fig2-v2.jpg	FALSE				Definitely okay
elife-13998-fig1-v1.jpg	TRUE	N	N	N	Definitely problematic	Overlay in Figure E
elife-14029-fig6-v4.jpg	TRUE	Y	NA	Y	Definitely okay	Green and red are in different figures
elife-14120-fig1-v1.jpg	FALSE				Definitely okay
elife-14170-fig10-v2.jpg	TRUE	Y	Y	N	Definitely okay	Heatmap
elife-14197-fig1-v1.jpg	TRUE	Y	Y	N	Definitely okay	Heatmap and labels compensate for the red/green
elife-14521-fig3-v2.jpg	TRUE	Y	Y	N	Definitely okay	Heatmap and labels compensate for the red/green
elife-14614-fig3-v3.jpg	FALSE				Definitely okay
elife-14618-fig7-v2.jpg	TRUE	Y	N	Y	Definitely okay	Sufficent contrast
elife-14643-fig3-v2.jpg	TRUE	N	N	N	Definitely problematic	Figure C and A fail to label their heatmap.
elife-14692-fig5-v4.jpg	FALSE				Definitely okay
elife-14694-fig7-v1.jpg	FALSE				Definitely okay
elife-14730-fig6-v3.jpg	FALSE				Definitely okay
elife-14845-fig7-v1.jpg	TRUE	N	N	N	Definitely problematic	Figure D overlay
elife-14926-fig4-v1.jpg	TRUE	Y	Y	Y	Definitely okay
elife-14979-fig5-v2.jpg	TRUE	N	N	N	Definitely problematic	Overlay in most figures between red/green without enough contrast
elife-15251-fig3-v3.jpg	TRUE	N	N	N	Definitely problematic	Figure A overlay
elife-15275-fig6-v2.jpg	TRUE	Y	N	N	Probably okay	The contrast overcomes the lack of labelling and proximity
elife-15325-fig12-v2.jpg	FALSE				Definitely okay
elife-15448-fig3-v1.jpg	FALSE				Definitely okay
elife-15693-fig6-v2.jpg	TRUE	Y	N	Y	Definitely okay
elife-15751-fig3-v2.jpg	TRUE	Y	Y	N	Definitely okay
elife-15828-fig1-v2.jpg	TRUE	Y	Y	N	Definitely okay
elife-15828-fig4-v3.jpg	TRUE	Y	N	N	Probably okay	The contrast in Figure D overcomes the lack of labels
elife-15910-fig3-v3.jpg	FALSE				Definitely okay
elife-16059-fig7-v2.jpg	TRUE	Y	Y	N	Probably okay	The proximity of the lines make the labels hard to read.
elife-16262-fig4-v2.jpg	TRUE	Y	N	Y	Definitely okay	Red and greens are in different figures
elife-16335-fig6-v2.jpg	TRUE	N	Y	N	Probably problematic	The heatmap label for Figure A and B is spread out so it is hard to see the contrast
elife-16351-fig3-v2.jpg	FALSE				Definitely okay
elife-16415-fig1-v1.jpg	TRUE	Y	N	Y	Probably okay	The lack of labels is overcome by the high contrast and distance
elife-16472-fig1-v1.jpg	TRUE	Y	Y	N	Probably okay	The labeling and contrast in the overlay make it easier to see.
elife-16534-fig1-v1.jpg	TRUE	Y	Y	N	Probably okay	Labelling overcomes the lack of distance
elife-16673-fig5-v2.jpg	TRUE	Y	Y	N	Probably okay	The labeling and contrast overcome the lack of distance in the proteins.
elife-16793-fig7-v3.jpg	TRUE	Y	N	Y	Definitely okay
elife-17023-fig3-v3.jpg	FALSE				Definitely okay
elife-17023-fig5-v3.jpg	TRUE	Y	N	Y	Definitely okay	Red and greens are in different figures
elife-17111-fig10-v1.jpg	FALSE				Definitely okay
elife-17375-fig1-v2.jpg	TRUE	Y	N	Y	Definitely okay	Red and greens are in different figures. Overlay is between pink and green, so there is high contrast.
elife-17551-fig2-v1.jpg	FALSE				Definitely okay
elife-17556-fig4-v1.jpg	FALSE				Definitely okay
elife-17823-fig6-v2.jpg	TRUE	N	N	N	Definitely problematic	Overlay
elife-17903-fig4-v2.jpg	TRUE	Y	N	N	Probably okay	The high contrast in the protein helps make it easier to understand
elife-17936-fig1-v2.jpg	FALSE				Gray-scale
elife-17979-fig3-v1.jpg	FALSE				Definitely okay
elife-18023-fig6-v1.jpg	TRUE	Y	NA	N	Probably okay	The conencting red lines are different enough from the green protein.
elife-18082-fig7-v2.jpg	FALSE				Gray-scale
elife-18126-fig6-v2.jpg	FALSE				Definitely okay
elife-18129-fig3-v1.jpg	TRUE	Y	Y	N	Probably okay	The high contrast in the protein helps make it easier to understand
elife-18146-fig6-v1.jpg	TRUE	Y	Y	Y	Definitely okay
elife-18164-fig3-v2.jpg	TRUE	Y	Y	N	Definitely okay
elife-18270-fig7-v2.jpg	TRUE	Y	Y	Y	Definitely okay
elife-18295-fig3-v4.jpg	TRUE	N	N	N	Definitely problematic	Fig A overlay
elife-18295-fig5-v5.jpg	TRUE	N	N	N	Definitely problematic	Letter C, D, and E specifcally have overlay problems
elife-18345-fig9-v2.jpg	FALSE				Definitely okay
elife-18501-fig4-v1.jpg	TRUE	Y	NA	Y	Definitely okay
elife-18544-fig7-v2.jpg	TRUE	Y	Y	Y	Definitely okay
elife-18731-fig5-v1.jpg	FALSE				Definitely okay
elife-18857-fig8-v2.jpg	TRUE	Y	N	N	Probably problematic	In line graphs, the lines are too close together, although they have sufficent contrast.
elife-18882-fig4-v2.jpg	FALSE				Definitely okay
elife-18972-fig3-v3.jpg	TRUE	N	N	N	Definitely problematic	Figure B overlay
elife-18972-fig6-v3.jpg	TRUE	N	Y	N	Probably problematic	See Figure B with overlay of alpha helicies
elife-19131-fig6-v2.jpg	TRUE	N	Y	N	Probably problematic	In figure B, each shape is too small to help see the contrast
elife-19236-fig6-v2.jpg	FALSE				Definitely okay
elife-19272-fig7-v2.jpg	TRUE	Y	Y	N	Probably okay	The use of the shapes in the labels overcomes the lack of distance
elife-19295-fig1-v2.jpg	FALSE				Definitely okay
elife-19466-fig1-v2.jpg	TRUE	Y	Y	Y	Definitely okay
elife-19484-fig1-v2.jpg	FALSE				Definitely okay
elife-19510-fig5-v2.jpg	TRUE	Y	N	Y	Probably okay	High contrast helps mitigate the lack of labels.
elife-19531-fig5-v2.jpg	TRUE	Y	Y	Y	Definitely okay
elife-19671-fig4-v1.jpg	FALSE				Definitely okay
elife-19848-fig5-v2.jpg	TRUE	N	N	N	Probably problematic	While the heatmap lacks labels, you can still tell what the graph is showing.
elife-20023-fig3-v1.jpg	FALSE				Definitely okay
elife-20023-fig7-v1.jpg	FALSE				Definitely okay
elife-20178-fig1-v3.jpg	TRUE	Y	Y	Y	Definitely okay
elife-20198-fig5-v2.jpg	FALSE				Definitely okay
elife-20470-fig4-v1.jpg	TRUE	N	N	N	Definitely problematic
elife-20522-fig5-v2.jpg	TRUE	N	N	Y	Definitely okay	Red and green are in different figures.
elife-20542-fig8-v2.jpg	TRUE	Y	Y	Y	Definitely okay
elife-20556-fig8-v1.jpg	TRUE	Y	N	N	Probably okay	The high contrast compensates for the lack of labels.
elife-20707-fig5-v2.jpg	FALSE				Definitely okay
elife-20718-fig6-v4.jpg	TRUE	Y	N	N	Definitely okay	The high contrast compensates for the lack of labels.
elife-21397-fig1-v1.jpg	TRUE	Y	N	Y	Definitely okay
elife-21455-fig1-v2.jpg	FALSE				Definitely okay
elife-21475-fig8-v2.jpg	TRUE	N	N	N	Definitely problematic
elife-21510-fig1-v2.jpg	TRUE	Y	N	N	Probably problematic	Most of the colors have enough contrast, except a few shades are too close.
elife-21629-fig6-v2.jpg	FALSE				Definitely okay
elife-21886-fig3-v2.jpg	FALSE				Definitely okay
elife-21886-fig6-v2.jpg	TRUE	Y	N	N	Probably okay	The high contrast between the shades of green is likely sufficent.
elife-21937-fig7-v2.jpg	FALSE				Definitely okay
elife-22175-fig7-v1.jpg	FALSE				Definitely okay
elife-22187-fig1-v3.jpg	TRUE	Y	N	N	Probably okay	There is an overlay, but there is high contrast, which mitigates the issues.
elife-22206-fig3-v3.jpg	TRUE	Y	Y	N	Definitely okay	Heatmap
elife-22509-fig1-v2.jpg	TRUE	Y	Y	Y	Definitely okay
elife-22519-fig7-v1.jpg	TRUE	Y	NA	Y	Definitely okay
elife-22537-fig7-v1.jpg	TRUE	Y	Y	Y	Definitely okay
elife-22540-fig4-v1.jpg	TRUE	N	N	N	Definitely problematic	Small patches of green are indistinguishable in the overlay
elife-22626-fig2-v1.jpg	FALSE				Definitely okay
elife-22644-fig2-v1.jpg	TRUE	Y	N	Y	Probably okay	The high contrast and distance mitigate the lack of labels
elife-22644-fig3-v1.jpg	TRUE	N	N	N	Definitely problematic
elife-22906-fig3-v2.jpg	TRUE	Y	Y	Y	Definitely okay
elife-22974-fig2-v2.jpg	TRUE	Y	Y	N	Definitely okay	Heatmap
elife-23011-fig6-v3.jpg	TRUE	Y	N	Y	Definitely okay
elife-23235-fig10-v1.jpg	FALSE				Gray-scale
elife-23279-fig3-v1.jpg	TRUE	N	N	N	Definitely problematic
elife-23361-fig6-v2.jpg	FALSE				Definitely okay
elife-23386-fig9-v2.jpg	TRUE	Y	NA	Y	Probably okay	Red and green are in different figures.
elife-23468-fig3-v1.jpg	TRUE	Y	N	N	Probably okay	The high contrast and distance mitigate the lack of labels
elife-23471-fig2-v2.jpg	TRUE	N	N	N	Definitely problematic	The tan and green look very similar in protein D
elife-23473-fig2-v4.jpg	FALSE				Definitely okay
elife-23496-fig4-v1.jpg	FALSE				Definitely okay
elife-23496-fig7-v2.jpg	TRUE	N	N	N	Definitely problematic
elife-23609-fig9-v2.jpg	TRUE	Y	Y	N	Definitely okay
elife-23629-fig4-v2.jpg	TRUE	Y	Y	N	Definitely okay	The shape labels make the overlapping graph easier to read.
elife-23645-fig4-v1.jpg	TRUE	Y	Y	Y	Definitely okay
elife-23670-fig4-v3.jpg	TRUE	N	N	N	Definitely problematic
elife-23759-fig1-v2.jpg	TRUE	N	N	N	Definitely problematic	Figure C has red/green overlay
elife-23763-fig5-v4.jpg	TRUE	Y	N	Y	Probably okay	Some of the boxes don't have sufficent contrast.
elife-23866-fig6-v3.jpg	FALSE				Definitely okay
elife-24059-fig7-v2.jpg	FALSE				Gray-scale
elife-24125-fig8-v3.jpg	TRUE	Y	N	Y	Definitely okay
elife-24176-fig10-v1.jpg	FALSE				Definitely okay
elife-24231-fig12-v1.jpg	FALSE				Definitely okay
elife-24241-fig3-v2.jpg	FALSE				Definitely okay
elife-24265-fig2-v3.jpg	TRUE	N	N	N	Definitely problematic
elife-24271-fig1-v1.jpg	FALSE				Definitely okay
elife-24318-fig2-v2.jpg	TRUE	Y	Y	N	Definitely okay
elife-24336-fig5-v1.jpg	TRUE	N	N	N	Definitely problematic
elife-24364-fig2-v2.jpg	TRUE	Y	N	N	Probably okay	The labels and constrast mitigate the most problematic figure, figure D
elife-24573-fig7-v2.jpg	TRUE	Y	N	N	Definitely okay	High contrast mitigates the issue.
elife-24655-fig6-v2.jpg	FALSE				Definitely okay
elife-24665-fig2-v4.jpg	FALSE				Gray-scale
elife-24779-fig5-v4.jpg	TRUE	Y	Y	Y	Definitely okay
elife-24845-fig5-v3.jpg	TRUE	Y	N	N	Probably problematic	Figure D overlay issue, but there is some contrast.
elife-24910-fig6-v5.jpg	FALSE				Definitely okay
elife-24992-fig8-v2.jpg	TRUE	Y	Y	Y	Definitely okay
elife-25008-fig4-v4.jpg	TRUE	Y	Y	N	Definitely okay	Heatmap
elife-25060-fig1-v1.jpg	TRUE	N	N	N	Definitely problematic
elife-25139-fig4-v2.jpg	FALSE				Gray-scale
elife-25217-fig1-v2.jpg	TRUE	Y	Y	Y	Definitely okay
elife-25233-fig2-v2.jpg	TRUE	Y	Y	N	Definitely okay
elife-25384-fig6-v2.jpg	TRUE	N	N	N	Definitely problematic
elife-25492-fig5-v1.jpg	TRUE	Y	N	Y	Definitely okay
elife-25496-fig6-v2.jpg	TRUE	N	N	N	Definitely problematic
elife-25555-fig9-v2.jpg	TRUE	Y	Y	Y	Definitely okay
elife-25681-fig7-v2.jpg	TRUE	Y	Y	N	Definitely okay	Heatmap
elife-25716-fig1-v2.jpg	TRUE	Y	Y	Y	Definitely okay
elife-25885-fig2-v1.jpg	TRUE	Y	N	N	Probably okay	High contrast mitigates lack of labels and distance
elife-25902-fig11-v2.jpg	TRUE	N	N	N	Definitely problematic
elife-25940-fig1-v2.jpg	TRUE	Y	Y	Y	Definitely okay
elife-25964-fig4-v2.jpg	FALSE				Definitely okay
elife-26016-fig3-v2.jpg	TRUE	Y	Y	N	Definitely okay	Heatmap
elife-26129-fig4-v3.jpg	TRUE	Y	Y	Y	Definitely okay
elife-26231-fig3-v2.jpg	TRUE	Y	Y	Y	Definitely okay
elife-26338-fig6-v2.jpg	FALSE				Gray-scale
elife-26377-fig2-v3.jpg	TRUE	Y	N	N	Definitely okay	High contrast mitigates lack of labels and distance
elife-26410-fig2-v2.jpg	FALSE				Definitely okay
elife-26524-fig4-v2.jpg	FALSE				Definitely okay
elife-26556-fig2-v1.jpg	FALSE				Definitely okay
elife-26580-fig4-v1.jpg	TRUE	N	Y	N	Probably okay	The labels help significantly
elife-26609-fig7-v1.jpg	TRUE	Y	N	N	Probably okay	High contrast mitigates lack of labels and distance
elife-26642-fig3-v2.jpg	TRUE	Y	Y	Y	Definitely okay
elife-26759-fig1-v2.jpg	TRUE	Y	Y	Y	Definitely okay
elife-26801-fig1-v2.jpg	FALSE				Definitely okay
elife-26876-fig2-v1.jpg	FALSE				Definitely okay
elife-26886-fig8-v2.jpg	FALSE				Gray-scale
elife-26933-fig3-v2.jpg	FALSE				Definitely okay
elife-26975-fig7-v3.jpg	TRUE	Y	Y	Y	Definitely okay
elife-27057-fig6-v1.jpg	TRUE	Y	N	Y	Definitely okay
elife-27192-fig2-v2.jpg	TRUE	Y	N	Y	Definitely okay
elife-27210-fig5-v1.jpg	FALSE				Definitely okay
elife-27322-fig10-v2.jpg	TRUE	N	N	N	Probably problematic	There is only a small section of green in the protein near the red mutated amino acid.
elife-27362-fig3-v2.jpg	TRUE	N	N	N	Definitely problematic
elife-27402-fig2-v2.jpg	TRUE	Y	Y	Y	Definitely okay
elife-27445-fig4-v2.jpg	TRUE	Y	Y	N	Probably okay	The labelling and contrast helps elucidate the graph's meaning.
elife-27455-fig1-v3.jpg	FALSE				Definitely okay
elife-27455-fig4-v3.jpg	FALSE				Definitely okay
elife-27592-fig2-v2.jpg	TRUE	Y	N	Y	Probably okay	The contrast in the star could be greater in Figure A.
elife-27652-fig5-v3.jpg	FALSE				Definitely okay
elife-27669-fig8-v2.jpg	FALSE				Definitely okay
elife-27670-fig2-v4.jpg	FALSE				Definitely okay
elife-27679-fig3-v2.jpg	TRUE	Y	Y	N	Definitely okay
elife-27711-fig4-v1.jpg	TRUE	Y	Y	Y	Definitely okay
elife-27786-fig4-v2.jpg	FALSE				Definitely okay
elife-27860-fig10-v2.jpg	FALSE				Definitely okay
elife-27861-fig2-v1.jpg	FALSE				Definitely okay
elife-27868-fig6-v2.jpg	TRUE	Y	Y	Y	Definitely okay
elife-27872-fig7-v1.jpg	TRUE	Y	N	N	Probably okay	There is sufficent contrast between the red/green in the line graph.
elife-27879-fig3-v3.jpg	TRUE	Y	Y	N	Definitely okay
elife-28023-fig6-v1.jpg	TRUE	Y	Y	N	Definitely okay
elife-28032-fig8-v2.jpg	FALSE				Definitely okay
elife-28118-fig2-v2.jpg	FALSE				Definitely okay
elife-28118-fig6-v1.jpg	FALSE				Definitely okay
elife-28132-fig6-v2.jpg	TRUE	Y	Y	Y	Definitely okay
elife-28197-fig4-v1.jpg	FALSE				Definitely okay
elife-28202-fig6-v2.jpg	FALSE				Definitely okay
elife-28297-fig2-v2.jpg	TRUE	Y	N	N	Definitely okay	High contrast migitates lack of labeling
elife-28329-fig5-v2.jpg	TRUE	Y	Y	Y	Definitely okay
elife-28447-fig2-v2.jpg	TRUE	N	Y	N	Probably problematic	In figure B, the green doesn't have enough contrast with the red
elife-28619-fig4-v2.jpg	TRUE	Y	N	N	Probably okay	High contrast migitates lack of labeling
elife-28671-fig10-v2.jpg	TRUE	Y	N	N	Probably okay	High contrast migitates lack of labeling
elife-28685-fig5-v2.jpg	FALSE				Definitely okay
elife-28951-fig4-v2.jpg	TRUE	Y	N	N	Probably okay	High contrast migitates lack of labeling
elife-28985-fig9-v4.jpg	FALSE				Definitely okay
elife-29086-fig4-v3.jpg	TRUE	N	N	N	Definitely problematic
elife-29087-fig1-v2.jpg	TRUE	NA	Y	Y	Definitely okay	Red/green are in different figures.
elife-29107-fig3-v3.jpg	TRUE	Y	Y	Y	Definitely okay
elife-29118-fig2-v2.jpg	TRUE	Y	N	Y	Probably okay	High contrast migitates lack of labeling/distance
elife-29154-fig3-v1.jpg	FALSE				Definitely okay
elife-29303-fig5-v3.jpg	TRUE	N	N	N	Definitely problematic
elife-29330-fig7-v1.jpg	TRUE	N	N	N	Definitely problematic
elife-29507-fig7-v2.jpg	TRUE	Y	Y	Y	Definitely okay
elife-29539-fig2-v4.jpg	FALSE				Definitely okay
elife-29845-fig4-v1.jpg	TRUE	Y	Y	Y	Definitely okay
elife-30005-fig5-v2.jpg	FALSE				Definitely okay
elife-30057-fig1-v1.jpg	TRUE	Y	Y	Y	Definitely okay
elife-30057-fig5-v1.jpg	TRUE	N	N	N	Definitely problematic
elife-30058-fig8-v2.jpg	TRUE	Y	Y	Y	Definitely okay
elife-30115-fig1-v2.jpg	FALSE				Gray-scale
elife-30135-fig10-v4.jpg	TRUE	Y	N	N	Probably okay	Overlay in F-I, but high contast migitates the issue.
elife-30395-fig1-v2.jpg	TRUE	Y	Y	N	Definitely okay
elife-30442-fig4-v2.jpg	TRUE	N	N	N	Definitely problematic
elife-30506-fig3-v2.jpg	TRUE	Y	N	Y	Definitely okay
elife-30649-fig7-v2.jpg	TRUE	N	N	N	Definitely problematic
elife-30703-fig3-v2.jpg	FALSE				Definitely okay
elife-30760-fig2-v2.jpg	TRUE	Y	N	Y	Definitely okay
elife-30822-fig5-v2.jpg	TRUE	Y	N	N	Probably okay	High contrast in the protein overcomes the lack of labels.
elife-30842-fig1-v3.jpg	FALSE				Definitely okay
elife-30842-fig7-v2.jpg	TRUE	Y	N	Y	Definitely okay
elife-30947-fig3-v1.jpg	FALSE				Definitely okay
elife-30963-fig5-v2.jpg	TRUE	N	N	N	Definitely problematic
elife-31013-fig5-v2.jpg	FALSE				Definitely okay
elife-31234-fig7-v2.jpg	TRUE	Y	N	N	Definitely okay	High contrast overcomes lack of distance/labels
elife-31476-fig5-v2.jpg	TRUE	Y	Y	N	Definitely okay
elife-31628-fig4-v2.jpg	TRUE	Y	Y	Y	Definitely okay
elife-31649-fig2-v1.jpg	FALSE				Definitely okay
elife-31724-fig5-v2.jpg	TRUE	Y	Y	Y	Definitely okay
elife-31873-fig1-v3.jpg	TRUE	Y	Y	N	Definitely okay	Heatmap
elife-31873-fig11-v4.jpg	TRUE	Y	Y	Y	Definitely okay
elife-31918-fig4-v1.jpg	TRUE	Y	N	N	Probably okay	High contrast overcomes lack of labels
elife-32041-fig4-v1.jpg	FALSE				Definitely okay
elife-32137-fig2-v1.jpg	TRUE	Y	Y	N	Probably okay	Overlay, but the colors don't actually overlap
elife-32167-fig1-v2.jpg	FALSE				Definitely okay
elife-32177-fig3-v4.jpg	FALSE				Definitely okay
elife-32288-fig1-v1.jpg	TRUE	N	Y	N	Probably okay	The shape labels help a lot
elife-32303-fig2-v2.jpg	FALSE				Gray-scale
elife-32340-fig3-v2.jpg	FALSE				Definitely okay
elife-32472-fig2-v2.jpg	FALSE				Definitely okay
elife-32481-fig4-v2.jpg	TRUE	N	N	N	Definitely problematic
elife-32660-fig3-v2.jpg	TRUE	N	N	N	Definitely problematic
elife-32839-fig7-v3.jpg	TRUE	N	N	N	Definitely problematic
elife-32911-fig4-v1.jpg	TRUE	N	N	N	Definitely problematic	Merged image
elife-33065-fig1-v1.jpg	TRUE	Y	Y	Y	Definitely okay
elife-33099-fig1-v2.jpg	TRUE	Y	Y	N	Definitely okay
elife-33107-fig2-v1.jpg	FALSE				Definitely okay
elife-33183-fig3-v1.jpg	TRUE	N	N	N	Definitely problematic
elife-33333-fig3-v2.jpg	TRUE	N	N	N	Definitely problematic
elife-33334-fig5-v1.jpg	TRUE	Y	N	Y	Definitely okay
elife-33420-fig2-v2.jpg	FALSE				Definitely okay
elife-33423-fig10-v1.jpg	FALSE				Definitely okay
elife-33432-fig14-v2.jpg	TRUE	Y	Y	N	Definitely okay
elife-33456-fig6-v2.jpg	FALSE				Definitely okay
elife-33480-fig3-v2.jpg	TRUE	Y	Y	Y	Definitely okay
elife-33503-fig3-v2.jpg	TRUE	Y	Y	N	Definitely okay
elife-33505-fig1-v2.jpg	TRUE	Y	Y	Y	Definitely okay
elife-33684-fig5-v2.jpg	TRUE	Y	Y	N	Definitely okay
elife-33718-fig2-v2.jpg	TRUE	Y	Y	N	Definitely okay
elife-33752-fig11-v1.jpg	TRUE	Y	Y	Y	Definitely okay
elife-33947-fig5-v2.jpg	TRUE	Y	Y	N	Definitely okay
elife-33977-fig1-v1.jpg	TRUE	Y	N	Y	Definitely okay
elife-34025-fig6-v2.jpg	TRUE	Y	Y	N	Definitely okay
elife-34044-fig6-v1.jpg	FALSE				Definitely okay
elife-34186-fig6-v2.jpg	TRUE	Y	Y	N	Definitely okay
elife-34202-fig2-v1.jpg	TRUE	Y	N	N	Probably okay	High contrast
elife-34241-fig9-v2.jpg	FALSE				Definitely okay
elife-34282-fig4-v2.jpg	TRUE	Y	N	Y	Definitely okay
elife-34349-fig10-v2.jpg	TRUE	Y	Y	Y	Definitely okay
elife-34389-fig3-v2.jpg	TRUE	N	N	N	Definitely problematic
elife-34394-fig5-v3.jpg	TRUE	Y	N	N	Probably okay	High contrast compensates for the lack of labels
elife-34460-fig2-v3.jpg	TRUE	Y	Y	Y	Definitely okay
elife-34586-fig5-v1.jpg	TRUE	Y	Y	N	Definitely okay	Heatmap
elife-34681-fig2-v3.jpg	TRUE	Y	Y	N	Probably okay	The pointer to the green makes the overlay easier to read.
elife-34820-fig3-v1.jpg	FALSE				Definitely okay
elife-34958-fig3-v1.jpg	TRUE	Y	Y	Y	Definitely okay
elife-34960-fig4-v2.jpg	FALSE				Definitely okay
elife-35103-fig5-v1.jpg	FALSE				Gray-scale
elife-35176-fig6-v2.jpg	TRUE	Y	Y	Y	Definitely okay
elife-35222-fig6-v2.jpg	TRUE	Y	Y	Y	Definitely okay
elife-35264-fig5-v2.jpg	TRUE	Y	Y	Y	Definitely okay
elife-35337-fig4-v1.jpg	TRUE	Y	Y	Y	Definitely okay
elife-35449-fig4-v1.jpg	TRUE	Y	Y	Y	Definitely okay
elife-35500-fig9-v1.jpg	TRUE	Y	N	N	Probably okay	No labels, but the heatmap has enough contrast.
elife-35618-fig6-v2.jpg	TRUE	Y	Y	Y	Definitely okay
elife-35657-fig1-v1.jpg	TRUE	N	N	N	Definitely problematic
elife-35677-fig1-v2.jpg	TRUE	Y	N	N	Probably okay	Fig B and E could have more contrast.
elife-35816-fig6-v1.jpg	TRUE	Y	N	N	Probably okay	No labels, but the heatmap has enough contrast.
elife-35832-fig2-v2.jpg	TRUE	N	N	N	Definitely problematic
elife-35856-fig3-v2.jpg	TRUE	Y	Y	N	Definitely okay
elife-35949-fig2-v4.jpg	FALSE				Definitely okay
elife-35957-fig4-v1.jpg	TRUE	Y	Y	N	Definitely okay
elife-36068-fig5-v1.jpg	TRUE	Y	Y	Y	Definitely okay
elife-36131-fig4-v2.jpg	TRUE	N	N	N	Definitely problematic
elife-36158-fig2-v2.jpg	TRUE	Y	N	N	Probably okay	No labels, but the heatmap has enough contrast.
elife-36158-fig6-v2.jpg	TRUE	Y	N	N	Probably okay	No labels, but the heatmap has enough contrast.
elife-36217-fig5-v2.jpg	TRUE	N	N	N	Definitely problematic
elife-36258-fig7-v3.jpg	FALSE				Definitely okay
elife-36310-fig3-v2.jpg	TRUE	Y	N	N	Definitely okay	High contrast
elife-36428-fig5-v2.jpg	TRUE	N	N	N	Definitely problematic	Figure D green turns to the same gray color as other cells.
elife-36456-fig6-v2.jpg	FALSE				Definitely okay
elife-36523-fig3-v2.jpg	FALSE				Definitely okay
elife-36656-fig3-v2.jpg	TRUE	Y	Y	Y	Definitely okay
elife-36726-fig4-v2.jpg	TRUE	Y	Y	Y	Definitely okay
elife-36928-fig4-v1.jpg	TRUE	Y	Y	Y	Definitely okay
elife-37018-fig6-v2.jpg	FALSE				Definitely okay
elife-37059-fig2-v2.jpg	TRUE	Y	Y	Y	Definitely okay
elife-37084-fig5-v2.jpg	FALSE				Definitely okay
elife-37090-fig2-v3.jpg	TRUE	Y	N	Y	Definitely okay
elife-37093-fig6-v2.jpg	TRUE	N	N	N	Definitely problematic	See Figure A
elife-37275-fig2-v2.jpg	TRUE	Y	N	Y	Definitely okay
elife-37516-fig2-v3.jpg	TRUE	Y	NA	Y	Definitely okay
elife-37567-fig1-v2.jpg	FALSE				Definitely okay
elife-37663-fig4-v2.jpg	FALSE				Definitely okay
elife-37819-fig2-v1.jpg	TRUE	Y	Y	Y	Definitely okay
elife-37949-fig3-v2.jpg	TRUE	N	N	N	Definitely problematic
elife-38065-fig4-v2.jpg	FALSE				Definitely okay
elife-38105-fig6-v2.jpg	TRUE	Y	N	N	Probably okay	Contrast mitigates lack of labels and distance
elife-38187-fig5-v1.jpg	TRUE	Y	N	Y	Definitely okay
elife-38200-fig6-v1.jpg	FALSE				Definitely okay
elife-38242-fig10-v2.jpg	TRUE	Y	N	N	Probably problematic	Red squares around figures are slightly hard to tell
elife-38293-fig5-v2.jpg	FALSE				Definitely okay
elife-38309-fig6-v1.jpg	TRUE	N	N	N	Definitely problematic
elife-38314-fig13-v2.jpg	FALSE				Definitely okay
elife-38346-fig4-v2.jpg	TRUE	Y	Y	N	Definitely okay
elife-38371-fig12-v1.jpg	FALSE				Definitely okay
elife-38446-fig7-v2.jpg	FALSE				Definitely okay
elife-38461-fig2-v1.jpg	TRUE	Y	N	N	Definitely okay	High contrast mitigates lack of labels in the protein
elife-38465-fig3-v2.jpg	TRUE	Y	N	N	Definitely okay	High contrast
elife-38635-fig3-v2.jpg	TRUE	Y	Y	Y	Definitely okay
elife-38771-fig6-v1.jpg	TRUE	Y	Y	Y	Definitely okay
elife-38795-fig8-v2.jpg	FALSE				Definitely okay
elife-38856-fig7-v1.jpg	TRUE	Y	N	N	Probably okay	There is sufficent contrast, but the overlaying green and red in Figure B may be hard to read
elife-38888-fig3-v3.jpg	TRUE	N	N	N	Definitely problematic
elife-38968-fig5-v3.jpg	TRUE	N	N	N	Definitely problematic
elife-39016-fig3-v2.jpg	TRUE	N	N	N	Definitely problematic
elife-39028-fig2-v2.jpg	TRUE	Y	Y	Y	Definitely okay
elife-39028-fig4-v2.jpg	TRUE	Y	N	N	Definitely okay	High contrast
elife-39140-fig4-v2.jpg	FALSE				Definitely okay
elife-39188-fig2-v2.jpg	FALSE				Definitely okay
elife-39300-fig5-v2.jpg	FALSE				Definitely okay
elife-39427-fig2-v3.jpg	FALSE				Definitely okay
elife-39495-fig2-v1.jpg	FALSE				Definitely okay
elife-39497-fig7-v2.jpg	FALSE				Gray-scale
elife-39518-fig2-v2.jpg	TRUE	Y	Y	N	Definitely okay
elife-39575-fig6-v2.jpg	TRUE	Y	Y	Y	Definitely okay
elife-39637-fig2-v2.jpg	TRUE	Y	Y	Y	Definitely okay
elife-39723-fig4-v2.jpg	TRUE	Y	Y	Y	Definitely okay
elife-39723-fig5-v2.jpg	FALSE				Definitely okay
elife-39742-fig1-v3.jpg	FALSE				Definitely okay
elife-39813-fig1-v2.jpg	TRUE	Y	Y	Y	Definitely okay
elife-39981-fig3-v2.jpg	FALSE				Definitely okay
elife-40126-fig3-v2.jpg	FALSE				Definitely okay
elife-40179-fig3-v2.jpg	FALSE				Definitely okay
elife-40212-fig4-v3.jpg	TRUE	Y	Y	Y	Definitely okay
elife-40232-fig2-v2.jpg	TRUE	Y	Y	Y	Definitely okay
elife-40325-fig7-v2.jpg	TRUE	N	N	N	Definitely problematic	Overlay in Figure B.
elife-40385-fig1-v2.jpg	FALSE				Definitely okay
elife-40470-fig9-v1.jpg	TRUE	Y	Y	Y	Definitely okay
elife-40576-fig2-v2.jpg	FALSE				Definitely okay
elife-40578-fig2-v2.jpg	FALSE				Definitely okay
elife-40670-fig5-v2.jpg	TRUE	Y	N	N	Definitely okay
elife-40757-fig3-v1.jpg	TRUE	Y	N	Y	Definitely okay
elife-40815-fig5-v2.jpg	TRUE	Y	N	N	Definitely okay
elife-40818-fig2-v2.jpg	TRUE	Y	N	N	Probably okay	Overlay, but there is sufficent contrast.
elife-40843-fig1-v2.jpg	TRUE	Y	N	Y	Definitely okay
elife-40843-fig5-v2.jpg	TRUE	Y	Y	N	Definitely okay	Heatmap
elife-40919-fig4-v1.jpg	TRUE	Y	N	Y	Definitely okay
elife-40969-fig4-v2.jpg	FALSE				Definitely okay
elife-40988-fig1-v2.jpg	FALSE				Gray-scale
elife-41050-fig7-v2.jpg	TRUE	Y	N	N	Probably okay	High contrast in the overlay figures
elife-41076-fig4-v2.jpg	TRUE	Y	Y	N	Probably okay	In A1-A6, the red pointer is less visible
elife-41090-fig2-v1.jpg	TRUE	Y	Y	Y	Definitely okay
elife-41093-fig14-v1.jpg	FALSE				Definitely okay
elife-41301-fig4-v2.jpg	TRUE	N	N	N	Definitely problematic
elife-41313-fig4-v2.jpg	TRUE	Y	N	N	Probably okay	High contrast in the line graphs outweighs the lack of labels
elife-41444-fig6-v2.jpg	FALSE				Definitely okay
elife-41520-fig2-v1.jpg	TRUE	Y	Y	Y	Definitely okay
elife-41586-fig3-v2.jpg	FALSE				Definitely okay
elife-41770-fig5-v2.jpg	TRUE	Y	Y	N	Definitely okay
elife-41836-fig5-v1.jpg	FALSE				Gray-scale
elife-41855-fig4-v2.jpg	FALSE				Definitely okay
elife-41873-fig6-v2.jpg	FALSE				Definitely okay
elife-41913-fig1-v2.jpg	TRUE	Y	Y	Y	Definitely okay
elife-42149-fig6-v2.jpg	TRUE	N	N	N	Definitely problematic
elife-42150-fig2-v3.jpg	TRUE	Y	N	N	Probably okay	Enough contrast between green and yellow in the protein
elife-42182-fig6-v1.jpg	TRUE	N	N	N	Definitely problematic	In Figure B, the red disappears into the background
elife-42463-fig1-v1.jpg	FALSE				Definitely okay
elife-42499-fig4-v2.jpg	TRUE	Y	Y	Y	Definitely okay
elife-42528-fig6-v2.jpg	FALSE				Definitely okay
elife-42628-fig2-v3.jpg	FALSE				Definitely okay
elife-42628-fig8-v4.jpg	FALSE				Definitely okay
elife-42633-fig1-v1.jpg	TRUE	Y	NA	Y	Definitely okay
elife-42746-fig5-v2.jpg	FALSE				Definitely okay
elife-42747-fig3-v1.jpg	TRUE	Y	N	N	Probably okay	High contrast mitigates the lack of labels in the graph
elife-42930-fig6-v2.jpg	TRUE	Y	N	N	Definitely okay	High contrast
elife-42940-fig5-v1.jpg	TRUE	Y	Y	Y	Definitely okay
elife-42959-fig3-v2.jpg	FALSE				Definitely okay
elife-42959-fig5-v2.jpg	TRUE	Y	Y	N	Definitely okay
elife-42988-fig7-v2.jpg	TRUE	N	N	N	Definitely problematic
elife-42992-fig1-v2.jpg	TRUE	Y	Y	Y	Definitely okay
elife-43008-fig3-v2.jpg	TRUE	Y	N	Y	Definitely okay
elife-43022-fig6-v2.jpg	TRUE	Y	N	N	Probably okay	Figure D is good, but the middle may have slight issues with contrast.
elife-43024-fig7-v2.jpg	TRUE	N	N	N	Definitely problematic	Figure D
elife-43158-fig2-v2.jpg	FALSE				Definitely okay
elife-43186-fig1-v1.jpg	TRUE	Y	Y	Y	Definitely okay
elife-43229-fig2-v3.jpg	TRUE	Y	N	N	Probably okay	The contrast between red and green outweighs the lack of labels.
elife-43231-fig4-v2.jpg	TRUE	N	Y	Y	Probably okay	Only potential is the lack of contrast between colors on T and G in Figure A. Figure F also lacks contrast with W287
elife-43257-fig4-v1.jpg	TRUE	Y	N	Y	Definitely okay
elife-43333-fig6-v1.jpg	FALSE				Definitely okay
elife-43434-fig2-v2.jpg	TRUE	N	N	N	Probably problematic	In Figure C, the green looks simliar to the gray.
elife-43560-fig2-v1.jpg	TRUE	Y	N	N	Probably problematic	Line graph in A and B are hard to distinguish seperate lines
elife-43598-fig3-v2.jpg	TRUE	Y	Y	N	Definitely okay
elife-43606-fig6-v3.jpg	TRUE	N	N	Y	Probably problematic	In Figure A, the green and orange look too similar.
elife-43620-fig5-v3.jpg	TRUE	Y	Y	N	Definitely okay
elife-43646-fig3-v1.jpg	TRUE	N	N	N	Definitely problematic
elife-43668-fig1-v1.jpg	TRUE	Y	Y	Y	Definitely okay
elife-43735-fig9-v3.jpg	TRUE	Y	Y	N	Definitely okay	Heatmap
elife-43890-fig1-v2.jpg	TRUE	Y	N	N	Probably okay	While there is enough contrast, the lack of labels makes it harder to read Figure C.
elife-43920-fig5-v2.jpg	TRUE	Y	N	Y	Definitely okay
elife-43990-fig2-v2.jpg	FALSE				Definitely okay
elife-43996-fig6-v2.jpg	TRUE	Y	Y	Y	Definitely okay
elife-44031-fig6-v1.jpg	TRUE	Y	N	N	Probably okay	Figure E heatmap has no label, but the contrast is sufficent
elife-44158-fig5-v1.jpg	TRUE	Y	N	N	Definitely okay	High contrast
elife-44187-fig2-v2.jpg	TRUE	Y	Y	N	Definitely okay
elife-44215-fig7-v1.jpg	FALSE				Definitely okay
elife-44245-fig2-v2.jpg	TRUE	Y	Y	Y	Definitely okay	Figure A is the only one with color.
elife-44353-fig5-v2.jpg	TRUE	N	N	N	Definitely problematic
elife-44431-fig3-v3.jpg	TRUE	N	N	N	Definitely problematic
elife-44431-fig6-v3.jpg	TRUE	Y	Y	N	Definitely okay	Each colored dot has a different shape in Figure D
elife-44455-fig10-v1.jpg	TRUE	Y	N	N	Probably okay	In Figure B, the green and yellow look too similar, but there is a labeled heatmap
elife-44502-fig3-v2.jpg	FALSE				Gray-scale
elife-44527-fig1-v2.jpg	FALSE				Definitely okay
elife-44527-fig6-v2.jpg	TRUE	Y	Y	Y	Definitely okay
elife-44766-fig2-v2.jpg	TRUE	Y	N	N	Definitely okay	High contrast.
elife-44928-fig2-v2.jpg	TRUE	N	N	N	Definitely problematic
elife-44928-fig5-v2.jpg	TRUE	N	N	N	Definitely problematic
elife-44941-fig4-v1.jpg	TRUE	Y	Y	N	Definitely okay
elife-44942-fig4-v1.jpg	FALSE				Definitely okay
elife-45002-fig6-v2.jpg	TRUE	Y	N	N	Probably okay	Lack of labels and distance make Figure B and D harder to read.
elife-45009-fig1-v1.jpg	TRUE	Y	N	N	Definitely okay	High contrast.
elife-45040-fig8-v1.jpg	TRUE	Y	Y	Y	Definitely okay
elife-45051-fig2-v2.jpg	TRUE	Y	Y	Y	Definitely okay
elife-45068-fig4-v2.jpg	TRUE	Y	N	N	Definitely okay	High contrast.
elife-45100-fig10-v2.jpg	FALSE				Definitely okay
elife-45199-fig4-v3.jpg	TRUE	Y	Y	Y	Definitely okay
elife-45199-fig5-v2.jpg	FALSE				Definitely okay
elife-45248-fig5-v2.jpg	TRUE	N	N	N	Probably problematic	The merged image is green and purple, so it's not the issue. However, the red in Figure K is hard to see.
elife-45310-fig8-v2.jpg	TRUE	Y	N	Y	Definitely okay
elife-45313-fig6-v1.jpg	FALSE				Definitely okay
elife-45342-fig7-v2.jpg	FALSE				Definitely okay
elife-45403-fig3-v2.jpg	TRUE	Y	N	N	Probably okay	Needs better labels and distance, but the color contrast helps
elife-45421-fig3-v2.jpg	TRUE	Y	N	Y	Definitely okay
elife-45559-fig3-v1.jpg	TRUE	N	N	N	Definitely problematic
elife-45572-fig3-v2.jpg	TRUE	Y	Y	Y	Definitely okay
elife-45650-fig7-v3.jpg	FALSE				Definitely okay
elife-45672-fig4-v2.jpg	TRUE	Y	Y	Y	Definitely okay
elife-45954-fig7-v2.jpg	FALSE				Definitely okay
elife-46054-fig2-v2.jpg	TRUE	Y	Y	N	Definitely okay
elife-46131-fig3-v1.jpg	FALSE				Definitely okay
elife-46131-fig6-v1.jpg	FALSE				Definitely okay
elife-46188-fig8-v2.jpg	TRUE	Y	N	Y	Definitely okay
elife-46205-fig7-v1.jpg	TRUE	Y	N	Y	Definitely okay
elife-46267-fig4-v2.jpg	TRUE	N	N	N	Probably problematic	There might be enough contrast in the protein between red and green, but it is does make the protein harder to read.
elife-46269-fig1-v3.jpg	TRUE	Y	N	Y	Definitely okay
elife-46302-fig1-v2.jpg	TRUE	Y	N	N	Definitely okay	High contrast between red and green in the protein.
elife-46313-fig2-v3.jpg	TRUE	Y	N	N	Probably okay	Sufficent contrast between red and green in the protein, but it could still be difficult to decipher
elife-46327-fig4-v1.jpg	TRUE	Y	Y	Y	Definitely okay
elife-46351-fig1-v2.jpg	TRUE	Y	Y	N	Definitely okay	Heatmap has labels
elife-46402-fig1-v4.jpg	TRUE	N	Y	N	Definitely problematic	Clade 8 and 4 both look gray in simulated image
elife-46619-fig2-v2.jpg	FALSE				Definitely okay
elife-46687-fig6-v2.jpg	TRUE	NA	NA	Y	Definitely okay	Green and red are in seperate figures
elife-46710-fig3-v2.jpg	TRUE	Y	N	Y	Definitely okay
elife-46726-fig3-v1.jpg	TRUE	N	N	N	Definitely problematic
elife-46740-fig1-v2.jpg	TRUE	Y	Y	Y	Definitely okay
elife-46814-fig2-v1.jpg	TRUE	Y	N	Y	Definitely okay
elife-46870-fig7-v2.jpg	FALSE				Gray-scale
elife-46883-fig5-v3.jpg	FALSE				Definitely okay
elife-46926-fig7-v1.jpg	FALSE				Definitely okay
elife-47021-fig3-v2.jpg	TRUE	Y	N	N	Probably okay	Figure A is still readable, but there are so many colors that it becomes more difficult
elife-47060-fig4-v1.jpg	FALSE				Definitely okay
elife-47142-fig4-v1.jpg	TRUE	Y	N	Y	Definitely okay
elife-47163-fig3-v2.jpg	TRUE	N	N	N	Definitely problematic	Some of the red and green in the overlay are faded in the simulated image
elife-47246-fig6-v2.jpg	TRUE	Y	Y	Y	Definitely okay
elife-47346-fig3-v2.jpg	FALSE				Definitely okay
elife-47550-fig4-v1.jpg	TRUE	Y	Y	N	Definitely okay
elife-47606-fig2-v1.jpg	TRUE	Y	Y	Y	Definitely okay
elife-47611-fig5-v2.jpg	TRUE	N	N	N	Definitely problematic	See Figure B
elife-47613-fig5-v1.jpg	TRUE	N	N	N	Definitely problematic
elife-47673-fig1-v2.jpg	FALSE				Definitely okay
elife-47682-fig3-v1.jpg	FALSE				Definitely okay
elife-47699-fig3-v2.jpg	TRUE	Y	Y	N	Definitely okay
elife-47789-fig8-v2.jpg	FALSE				Definitely okay
elife-47859-fig4-v3.jpg	FALSE				Definitely okay
elife-47970-fig1-v1.jpg	TRUE	Y	N	N	Definitely okay
elife-47999-fig3-v2.jpg	TRUE	N	N	N	Definitely problematic	In Figure C, the red fades into the black in the simulated image
elife-47999-fig4-v2.jpg	TRUE	Y	N	N	Definitely okay
elife-48114-fig3-v1.jpg	TRUE	N	N	N	Definitely problematic	See Figure H and F
elife-48119-fig2-v2.jpg	TRUE	Y	N	Y	Definitely okay
elife-48160-fig5-v1.jpg	TRUE	N	N	N	Definitely problematic
elife-48190-fig2-v2.jpg	FALSE				Definitely okay
elife-48255-fig7-v1.jpg	FALSE				Gray-scale
elife-48281-fig7-v2.jpg	TRUE	Y	Y	N	Definitely okay
elife-48469-fig5-v2.jpg	TRUE	Y	N	N	Definitely okay
elife-48498-fig4-v2.jpg	TRUE	Y	N	Y	Definitely okay
elife-48615-fig2-v2.jpg	TRUE	N	N	N	Definitely problematic
elife-48702-fig4-v2.jpg	FALSE				Definitely okay
elife-48787-fig4-v2.jpg	TRUE	Y	N	N	Probably okay	Figure A and B have many overlapping lines without labels which makes it harder to read
elife-48885-fig4-v2.jpg	TRUE	Y	Y	Y	Definitely okay
elife-48909-fig1-v1.jpg	FALSE				Definitely okay
elife-49023-fig4-v2.jpg	TRUE	Y	N	Y	Definitely okay
elife-49050-fig5-v2.jpg	TRUE	N	N	N	Definitely problematic
elife-49252-fig8-v2.jpg	TRUE	Y	N	Y	Definitely okay
elife-49405-fig1-v1.jpg	TRUE	Y	N	N	Definitely okay
elife-49416-fig5-v1.jpg	TRUE	Y	Y	N	Definitely okay	Heatmap in Figure B
elife-49424-fig7-v1.jpg	TRUE	Y	N	Y	Definitely okay
elife-49458-fig4-v1.jpg	FALSE				Definitely okay
elife-49503-fig1-v1.jpg	FALSE				Definitely okay
elife-49577-fig2-v2.jpg	TRUE	Y	N	Y	Definitely okay
elife-49662-fig5-v3.jpg	TRUE	Y	Y	Y	Definitely okay
elife-49796-fig2-v2.jpg	FALSE				Definitely okay
elife-49801-fig6-v4.jpg	FALSE				Definitely okay
elife-49817-fig1-v2.jpg	TRUE	Y	N	N	Probably okay	In Figure F, the green and red might be too similar.
elife-49818-fig5-v1.jpg	TRUE	Y	N	N	Definitely okay
elife-49872-fig2-v2.jpg	FALSE				Definitely okay
elife-49921-fig4-v2.jpg	TRUE	N	Y	N	Definitely problematic	In Figure E, the dotted box mitigates the overlay, but it is difficult to see.
elife-49921-fig6-v2.jpg	TRUE	N	N	N	Definitely problematic
elife-49962-fig2-v1.jpg	TRUE	Y	N	Y	Definitely okay
elife-50231-fig8-v2.jpg	TRUE	Y	N	N	Probably okay	Figure B has overlay, but there is likely enough contrast.
elife-50279-fig3-v2.jpg	TRUE	Y	N	N	Probably problematic	In the background of the proteins, the green and orange look to similar.
elife-50279-fig6-v2.jpg	TRUE	Y	Y	N	Definitely okay
elife-50294-fig5-v2.jpg	FALSE				Gray-scale
elife-50316-fig7-v2.jpg	FALSE				Definitely okay
elife-50345-fig1-v2.jpg	FALSE				Definitely okay
elife-50401-fig5-v2.jpg	TRUE	Y	Y	Y	Definitely okay
elife-50524-fig8-v1.jpg	FALSE				Definitely okay
elife-50571-fig7-v1.jpg	TRUE	Y	N	Y	Definitely okay
elife-50576-fig8-v2.jpg	TRUE	Y	N	N	Probably okay	In Figures A and C, the green parts of the protein over the orange do not have sufficient contrast
elife-50598-fig2-v2.jpg	TRUE	Y	N	N	Probably okay	Figure B is missing a label for its heatmap.
elife-50617-fig2-v2.jpg	FALSE				Definitely okay
elife-50654-fig7-v1.jpg	TRUE	Y	NA	Y	Definitely okay
elife-50705-fig1-v2.jpg	TRUE	Y	Y	Y	Definitely okay
elife-50765-fig1-v1.jpg	TRUE	Y	Y	N	Definitely okay
elife-50807-fig7-v2.jpg	TRUE	Y	Y	Y	Definitely okay
elife-50933-fig2-v3.jpg	FALSE				Definitely okay
elife-50945-fig6-v2.jpg	TRUE	Y	N	N	Definitely okay
elife-50963-fig4-v2.jpg	TRUE	Y	N	N	Definitely okay	High contrast in the protein
elife-51002-fig5-v2.jpg	FALSE				Definitely okay
elife-51005-fig6-v2.jpg	TRUE	Y	N	Y	Definitely okay
elife-51031-fig2-v2.jpg	TRUE	N	N	N	Definitely problematic
elife-51156-fig1-v2.jpg	TRUE	Y	Y	Y	Definitely okay
elife-51179-fig4-v2.jpg	TRUE	N	N	N	Definitely problematic
elife-51221-fig1-v2.jpg	TRUE	Y	N	N	Probably okay	Figure E and F have many colors, but there is sufficient contrast
elife-51230-fig7-v2.jpg	TRUE	Y	N	N	Probably okay	Slight color issues with the red and green in the proteins
elife-51254-fig4-v3.jpg	TRUE	Y	Y	N	Definitely okay
elife-51260-fig2-v1.jpg	FALSE				Definitely okay
elife-51271-fig1-v1.jpg	TRUE	Y	Y	N	Definitely okay
elife-51404-fig1-v2.jpg	TRUE	Y	Y	N	Definitely okay
elife-51407-fig5-v2.jpg	FALSE				Gray-scale
elife-51412-fig14-v1.jpg	TRUE	Y	Y	N	Definitely okay
elife-51419-fig4-v1.jpg	FALSE				Definitely okay
elife-51449-fig1-v2.jpg	TRUE	Y	Y	N	Definitely okay
elife-51453-fig4-v2.jpg	TRUE	Y	N	N	Definitely okay
elife-51466-fig5-v2.jpg	TRUE	Y	Y	Y	Definitely okay
elife-51529-fig3-v2.jpg	FALSE				Definitely okay
elife-51529-fig5-v2.jpg	FALSE				Definitely okay
elife-51701-fig3-v2.jpg	FALSE				Definitely okay
elife-51735-fig8-v2.jpg	FALSE				Definitely okay
elife-51773-fig5-v2.jpg	FALSE				Definitely okay
elife-51781-fig3-v2.jpg	TRUE	Y	N	N	Probably okay	See Figure B-E, overlapping lines have confusing colors
elife-51822-fig5-v1.jpg	TRUE	Y	Y	N	Definitely okay
elife-51859-fig4-v1.jpg	TRUE	N	N	N	Definitely problematic	Red box over green disappears
elife-51888-fig7-v2.jpg	FALSE				Gray-scale
elife-52067-fig3-v2.jpg	TRUE	Y	Y	Y	Definitely okay
elife-52069-fig5-v1.jpg	TRUE	Y	N	Y	Definitely okay
elife-52253-fig4-v1.jpg	TRUE	Y	N	N	Definitely okay	High contrast
elife-52322-fig6-v3.jpg	TRUE	N	N	N	Probably problematic	Very limited red in the overlay in Figure A.
elife-52343-fig3-v1.jpg	TRUE	Y	N	N	Definitely okay
elife-52416-fig4-v2.jpg	TRUE	N	Y	Y	Probably okay	In Figure B, there is limited contrast between red and green.
elife-52420-fig1-v1.jpg	FALSE				Definitely okay
elife-52423-fig6-v2.jpg	TRUE	N	N	N	Definitely problematic
elife-52482-fig7-v2.jpg	FALSE				Definitely okay
elife-52483-fig5-v1.jpg	FALSE				Definitely okay
elife-52504-fig2-v2.jpg	TRUE	N	N	N	Definitely problematic
elife-52505-fig3-v2.jpg	FALSE				Definitely okay
elife-52551-fig1-v3.jpg	TRUE	Y	Y	Y	Definitely okay
elife-52555-fig2-v4.jpg	TRUE	Y	Y	Y	Definitely okay
elife-52648-fig1-v2.jpg	FALSE				Definitely okay
elife-52654-fig8-v2.jpg	FALSE				Definitely okay
elife-52676-fig6-v2.jpg	TRUE	Y	N	N	Definitely okay	High contrast in the overlay completely mitigates problem
elife-52765-fig2-v2.jpg	FALSE				Definitely okay
elife-52775-fig4-v3.jpg	FALSE				Definitely okay
elife-52899-fig4-v2.jpg	TRUE	Y	Y	Y	Definitely okay
elife-52981-fig1-v1.jpg	FALSE				Definitely okay
elife-53003-fig4-v2.jpg	FALSE				Gray-scale
elife-53227-fig5-v2.jpg	TRUE	Y	Y	N	Definitely okay
elife-53247-fig9-v2.jpg	FALSE				Definitely okay
elife-53278-fig4-v2.jpg	TRUE	Y	Y	N	Definitely okay	High contrast plus labels
elife-53308-fig8-v4.jpg	TRUE	Y	N	Y	Definitely okay
elife-53392-fig5-v2.jpg	TRUE	Y	N	N	Definitely okay	High contrast
elife-53449-fig1-v2.jpg	FALSE				Definitely okay
elife-53456-fig8-v2.jpg	TRUE	Y	NA	Y	Definitely okay
elife-53476-fig4-v2.jpg	TRUE	Y	NA	Y	Definitely okay
elife-53514-fig2-v2.jpg	TRUE	Y	N	N	Probably okay	Overlay in Figure D is the hardest
elife-53514-fig4-v2.jpg	TRUE	Y	N	N	Probably okay	Overlay in Figure C is the hardest
elife-53798-fig8-v1.jpg	TRUE	Y	N	N	Definitely okay	High contrast
elife-53814-fig2-v2.jpg	TRUE	N	N	N	Definitely problematic
elife-53889-fig1-v2.jpg	TRUE	N	Y	N	Probably okay	Heat map, but not sufficient contrast
elife-53900-fig1-v1.jpg	TRUE	Y	N	Y	Definitely okay
elife-53934-fig5-v3.jpg	TRUE	Y	N	Y	Definitely okay
elife-53972-fig5-v1.jpg	TRUE	Y	N	N	Probably okay	There could be overlap in Figure a'
elife-54082-fig5-v2.jpg	TRUE	Y	Y	Y	Definitely okay
elife-54136-fig6-v2.jpg	TRUE	Y	N	Y	Definitely okay
elife-54160-fig2-v1.jpg	FALSE				Definitely okay
elife-54160-fig5-v1.jpg	FALSE				Definitely okay
elife-54229-fig2-v2.jpg	TRUE	N	N	N	Definitely problematic
elife-54257-fig1-v1.jpg	TRUE	N	N	N	Definitely problematic
elife-54264-fig1-v1.jpg	FALSE				Definitely okay
elife-54311-fig8-v2.jpg	TRUE	Y	NA	Y	Definitely okay
elife-54346-fig9-v2.jpg	FALSE				Definitely okay
elife-54462-fig6-v1.jpg	TRUE	Y	Y	Y	Definitely okay
elife-54566-fig5-v2.jpg	TRUE	Y	Y	Y	Definitely okay
elife-54568-fig8-v2.jpg	TRUE	N	N	N	Definitely problematic	Red fades away in Figure A-H
elife-54655-fig4-v2.jpg	TRUE	Y	Y	Y	Definitely okay
elife-54756-fig4-v1.jpg	TRUE	Y	Y	Y	Definitely okay
elife-54756-fig6-v1.jpg	TRUE	Y	Y	Y	Definitely okay
elife-54868-fig7-v2.jpg	FALSE				Definitely okay
elife-54875-fig1-v1.jpg	TRUE	Y	N	Y	Definitely okay
elife-55002-fig1-v2.jpg	TRUE	Y	Y	Y	Definitely okay
elife-55119-fig1-v2.jpg	TRUE	Y	Y	Y	Definitely okay
elife-55119-fig7-v2.jpg	TRUE	Y	N	N	Probably okay	Figure B has overlapping color
elife-55155-fig4-v2.jpg	TRUE	Y	N	N	Definitely okay
elife-55199-fig5-v1.jpg	TRUE				Definitely problematic	Figure A and B have overlap of green and red that can't be tell apart
elife-55316-fig4-v1.jpg	FALSE				Definitely okay
elife-55319-fig4-v2.jpg	TRUE	Y	NA	Y	Definitely okay
elife-55619-fig4-v1.jpg	FALSE				Definitely okay
elife-55650-fig3-v2.jpg	FALSE				Definitely okay
elife-55865-fig3-v2.jpg	TRUE	Y	N	Y	Definitely okay
elife-55865-fig7-v2.jpg	TRUE	N	N	N	Definitely problematic	Overlay of green and red
elife-55979-fig11-v3.jpg	TRUE	Y	Y	Y	Definitely okay
elife-55994-fig7-v1.jpg	FALSE				Definitely okay
elife-56020-fig1-v2.jpg	TRUE	Y	NA	Y	Definitely okay
elife-56077-fig8-v1.jpg	TRUE	Y	NA	Y	Definitely okay
elife-56096-fig3-v3.jpg	TRUE	Y	Y	Y	Definitely okay
elife-56110-fig8-v2.jpg	TRUE	Y	Y	N	Definitely okay
elife-56371-fig7-v2.jpg	TRUE	Y	Y	Y	Definitely okay
elife-56474-fig1-v1.jpg	TRUE	Y	N	N	Definitely okay	There is enough contrast
elife-56491-fig1-v2.jpg	TRUE	Y	N	Y	Definitely okay
elife-56523-fig6-v2.jpg	TRUE	Y	Y	Y	Definitely okay
elife-56605-fig10-v2.jpg	TRUE	Y	Y	N	Definitely okay	Heat map labels help
elife-56664-fig3-v1.jpg	TRUE	Y	N	N	Probably okay	There may be enogh contract between red and green
elife-56725-fig3-v2.jpg	TRUE	Y	NA	Y	Definitely okay
elife-56755-fig4-v2.jpg	TRUE	Y	N	Y	Definitely okay
elife-56811-fig5-v1.jpg	TRUE	N	N	N	Definitely problematic
elife-56860-fig3-v1.jpg	FALSE				Gray-scale
elife-56862-fig3-v2.jpg	TRUE	Y	N	N	Definitely okay
elife-56882-fig1-v2.jpg	FALSE				Definitely okay
elife-56893-fig7-v2.jpg	FALSE				Definitely okay
elife-56942-fig1-v2.jpg	TRUE	Y	Y	Y	Definitely okay
elife-56945-fig6-v1.jpg	TRUE	Y	Y	Y	Definitely okay
elife-57051-fig3-v1.jpg	FALSE				Definitely okay
elife-57149-fig8-v2.jpg	TRUE	Y	N	N	Probably okay	There is enough contract between red and green
elife-57155-fig1-v2.jpg	TRUE	N	N	N	Definitely problematic
elife-57183-fig5-v3.jpg	FALSE				Definitely okay
elife-57245-fig1-v3.jpg	TRUE	Y	N	Y	Definitely okay
elife-57245-fig3-v4.jpg	FALSE				Definitely okay
elife-57445-fig4-v2.jpg	TRUE	Y	NA	Y	Definitely okay
elife-57502-fig5-v2.jpg	TRUE	N	N	N	Definitely problematic	There is label but not mitigate color issue
elife-57519-fig4-v3.jpg	TRUE	Y	Y	Y	Definitely okay
elife-57617-fig4-v2.jpg	TRUE	Y	N	N	Definitely okay
elife-57659-fig1-v1.jpg	TRUE	Y	N	N	Probably okay	Figure B it is harder to see the red
elife-57679-fig2-v2.jpg	TRUE	Y	N	Y	Definitely okay
elife-57681-fig3-v5.jpg	TRUE	Y	NA	Y	Definitely okay
elife-57732-fig4-v1.jpg	TRUE	N	N	N	Definitely problematic	Figure B layout
elife-57831-fig1-v3.jpg	FALSE				Definitely okay
elife-58026-fig1-v1.jpg	TRUE	Y	N	Y	Definitely okay
elife-58026-fig6-v1.jpg	FALSE				Definitely okay
elife-58042-fig1-v2.jpg	TRUE	Y	Y	Y	Definitely okay
elife-58046-fig7-v2.jpg	TRUE	N	N	N	Definitely problematic
elife-58061-fig4-v2.jpg	TRUE	Y	Y	N	Definitely okay
elife-58077-fig1-v1.jpg	TRUE	Y	N	Y	Definitely okay
elife-58097-fig6-v2.jpg	FALSE				Definitely okay
elife-58114-fig6-v3.jpg	TRUE	Y	N	N	Definitely okay	High contrast in the protein
elife-58281-fig7-v1.jpg	TRUE	Y	Y	Y	Definitely okay
elife-58313-fig1-v2.jpg	FALSE				Definitely okay
elife-58331-fig8-v2.jpg	FALSE				Definitely okay
elife-58341-fig5-v2.jpg	FALSE				Definitely okay
elife-58509-fig2-v2.jpg	FALSE				Definitely okay
elife-58509-fig7-v2.jpg	FALSE				Definitely okay
elife-58537-fig1-v2.jpg	FALSE				Definitely okay
elife-58749-fig9-v2.jpg	TRUE	Y	N	N	Definitely okay
elife-58764-fig2-v2.jpg	FALSE				Definitely okay
elife-58768-fig1-v2.jpg	TRUE	Y	N	Y	Definitely okay
elife-58795-fig2-v2.jpg	TRUE	N	Y	Y	Probably okay	Lack of contrast is made up with label
elife-58828-fig7-v2.jpg	TRUE	Y	Y	N	Definitely okay
elife-58838-fig4-v2.jpg	FALSE				Definitely okay
elife-58901-fig2-v1.jpg	TRUE	Y	Y	Y	Probably okay	Figure C there is so many colors, it hard to tell the difference
elife-59079-fig3-v2.jpg	FALSE				Definitely okay
elife-59166-fig3-v2.jpg	FALSE				Definitely okay
elife-59258-fig2-v1.jpg	TRUE	N	N	N	Definitely problematic	Overlap of red and green Figure F
elife-59390-fig6-v1.jpg	TRUE	Y	N	N	Probably okay	High contrast helps with the overlap of red and green
elife-59390-fig7-v1.jpg	FALSE				Definitely okay
elife-59430-fig8-v2.jpg	TRUE	Y	N	Y	Definitely okay
elife-59465-fig1-v2.jpg	TRUE	N	N	N	Definitely problematic
elife-59686-fig3-v3.jpg	TRUE	Y	Y	Y	Definitely okay
elife-59784-fig2-v2.jpg	FALSE				Definitely okay
elife-59791-fig5-v3.jpg	FALSE				Definitely okay
elife-59798-fig1-v1.jpg	TRUE	Y	Y	N	Definitely okay	Heat map labels helps with color issue
elife-59809-fig4-v1.jpg	FALSE				Definitely okay
elife-59885-fig6-v2.jpg	TRUE	Y	Y	N	Probably problematic	While there is label, the red in green is hard to see
elife-59929-fig5-v2.jpg	FALSE				Definitely okay
elife-59980-fig1-v2.jpg	FALSE				Definitely okay
elife-59980-fig5-v2.jpg	TRUE	Y	N	Y	Definitely okay
elife-59988-fig4-v1.jpg	TRUE	Y	N	Y	Definitely okay
elife-60005-fig2-v1.jpg	TRUE	Y	N	Y	Definitely okay
elife-60058-fig3-v1.jpg	TRUE	Y	N	Y	Definitely okay	Blue box help tell appart the red and green
elife-60125-fig3-v2.jpg	TRUE	N	N	N	Definitely problematic	Overlap of red and green in Figure A
elife-60474-fig6-v2.jpg	TRUE	Y	Y	Y	Definitely okay
elife-60482-fig7-v2.jpg	TRUE	Y	N	Y	Definitely okay
elife-60533-fig7-v2.jpg	TRUE	Y	N	N	Definitely okay
elife-60552-fig2-v2.jpg	TRUE	Y	NA	Y	Definitely okay
elife-60552-fig3-v2.jpg	FALSE				Definitely okay
elife-60595-fig6-v1.jpg	FALSE				Definitely okay
elife-60673-fig4-v2.jpg	TRUE	Y	N	Y	Probably okay	Figure A the shade of green and yellow are too hard to distinguish
elife-60742-fig9-v2.jpg	TRUE	Y	Y	Y	Definitely okay
elife-60751-fig6-v2.jpg	TRUE	Y	N	N	Definitely okay
elife-60917-fig2-v2.jpg	TRUE	Y	Y	N	Definitely okay	Heat map label helps
elife-60920-fig4-v3.jpg	FALSE				Definitely okay
elife-60985-fig4-v1.jpg	TRUE	N	N	N	Definitely problematic	See Figure B
elife-61050-fig8-v1.jpg	TRUE	N	N	N	Definitely problematic
elife-61050-fig10-v1.jpg	TRUE	Y	Y	N	Definitely okay
elife-61083-fig3-v2.jpg	TRUE	N	N	N	Definitely problematic
elife-61135-fig1-v2.jpg	TRUE	N	N	N	Definitely problematic	See Figure B overlay
elife-61302-fig8-v2.jpg	TRUE	N	N	N	Definitely problematic	See Figure A, C, E, and G
elife-61317-fig5-v3.jpg	FALSE				Definitely okay
elife-61406-fig6-v1.jpg	TRUE	Y	N	Y	Definitely okay
elife-61413-fig8-v1.jpg	FALSE				Definitely okay
elife-61453-fig5-v2.jpg	TRUE	Y	Y	Y	Definitely okay
elife-61590-fig4-v1.jpg	FALSE				Definitely okay
elife-61722-fig2-v1.jpg	FALSE				Definitely okay
elife-61797-fig7-v2.jpg	FALSE				Definitely okay
elife-61886-fig12-v2.jpg	FALSE				Gray-scale
elife-61921-fig2-v2.jpg	TRUE	Y	N	N	Definitely okay
elife-61973-fig1-v1.jpg	TRUE	Y	Y	Y	Definitely okay
elife-61973-fig6-v1.jpg	TRUE	Y	Y	N	Definitely okay	Heat map label in Figure E-G helps
elife-62084-fig5-v2.jpg	FALSE				Definitely okay
elife-62117-fig3-v2.jpg	TRUE	Y	N	N	Probably okay	There may not be sufficient color contrast
elife-62123-fig4-v2.jpg	TRUE	Y	N	Y	Definitely okay	Seperate figures
elife-62123-fig6-v2.jpg	TRUE	N	N	N	Definitely problematic	Figure A has overlay of red and green
elife-62161-fig4-v2.jpg	FALSE				Definitely okay
elife-62183-fig1-v2.jpg	TRUE	Y	N	N	Definitely okay	Heat map label for Firgure B, D, and F helps. Figure G, H, and I line graph have no labels but enough contrast
elife-62236-fig1-v1.jpg	FALSE				Definitely okay
elife-00003-fig3-v1	TRUE	N	NA	N	Probably problematic	The red label in Figure C is too hard to read
elife-00031-fig4-v1	FALSE				Definitely okay
elife-00036-fig2-v1	TRUE	NA	NA	Y	Definitely okay
elife-00036-fig6-v1	TRUE	N	Y	Y	Definitely okay
elife-00133-fig2-v1	FALSE				Gray-scale
elife-00160-fig5-v1	TRUE	N	N	N	Definitely problematic
elife-00170-fig1-v1	FALSE				Gray-scale
elife-00184-fig2-v1	TRUE	Y	Y	Y	Definitely okay
elife-00184-fig9-v1	TRUE	Y	Y	N	Probably okay	Protein ligand is label which helps it
elife-00190-fig8-v1	TRUE	Y	Y	N	Definitely okay
elife-00218-fig7-v1	TRUE	Y	Y	Y	Definitely okay
elife-00220-fig5-v1	TRUE	N	N	N	Definitely problematic
elife-00247-fig2-v1	TRUE	Y	N	Y	Definitely okay
elife-00288-fig4-v1	TRUE	NA	NA	Y	Definitely okay
elife-00299-fig1-v1	FALSE				Definitely okay
elife-00299-fig2-v1	TRUE	Y	N	N	Definitely okay	High contrast
elife-00308-fig5-v1	FALSE				Gray-scale
elife-00308-fig6-v1	FALSE				Gray-scale
elife-00321-fig2-v1	FALSE				Gray-scale
elife-00324-fig4-v1	TRUE	Y	Y	N	Probably okay	Figure B have overlay, but contrast and label help distinguish the color
elife-00329-fig6-v1	FALSE				Gray-scale
elife-00329-fig12-v1	FALSE				Gray-scale
elife-00333-fig4-v1	TRUE	Y	Y	Y	Definitely okay
elife-00334-fig3-v1	TRUE	Y	N	N	Definitely okay
elife-00336-fig5-v1	TRUE	N	N	N	Definitely problematic
elife-00337-fig2-v1	TRUE	N	N	N	Definitely problematic
elife-00348-fig7-v1	TRUE	Y	Y	Y	Definitely okay
elife-00362-fig8-v1	TRUE	Y	N	N	Probably okay	Merge in Figure D have overlay of red and green, but there is enough contrast.
elife-00380-fig3-v1	TRUE	N	N	N	Definitely problematic
elife-00400-fig1-v1	TRUE	N	N	N	Definitely problematic
elife-00400-fig3-v1	TRUE	Y	N	N	Probably okay	Figure B has red and green, but there is enough contrast to distinguish between them
elife-00425-fig7-v1	TRUE	Y	N	N	Definitely okay
elife-00467-fig5-v1	FALSE				Gray-scale
elife-00508-fig3-v1	TRUE	N	N	N	Definitely problematic
elife-00537-fig2-v1	TRUE	Y	N	N	Definitely okay	Heat map
elife-00569-fig2-v1	TRUE	Y	N	Y	Definitely okay
elife-00592-fig7-v1	FALSE				Definitely okay
elife-00594-fig9-v1	FALSE				Definitely okay
elife-00603-fig11-v1	FALSE				Definitely okay
elife-00631-fig6-v1	FALSE				Gray-scale
elife-00632-fig6-v1	FALSE				Definitely okay
elife-00647-fig11-v1	FALSE				Gray-scale
elife-00654-fig5-v1	TRUE	Y	N	N	Definitely okay	Heat map
elife-00666-fig4-v1	TRUE	N	N	N	Definitely problematic	Look at Figure D
elife-00704-fig2-v1	TRUE	N	N	N	Definitely problematic
elife-00708-fig2-v1	TRUE	Y	N	N	Definitely okay
elife-00731-fig11-v1	TRUE	Y	Y	Y	Definitely okay
elife-00747-fig3-v1	FALSE				Definitely okay
elife-00750-fig4-v1	TRUE	Y	N	N	Probably okay	Firgures A-C jhave enough contrast, but there are no clear labels
elife-00757-fig3-v1	FALSE				Definitely okay
elife-00759-fig2-v1	TRUE	Y	N	Y	Definitely okay
elife-00772-fig5-v1	FALSE				Definitely okay
elife-00790-fig1-v1	TRUE	N	N	N	Definitely problematic	Not enough contrast between green and orange
elife-00790-fig6-v1	FALSE				Gray-scale
elife-00801-fig4-v1	TRUE	Y	N	N	Probably okay	Figures C, D, and E have red and green, but there are enough contrast
elife-00813-fig6-v1	TRUE	Y	Y	N	Definitely okay
elife-00824-fig6-v1	TRUE	Y	Y	Y	Definitely okay
elife-00829-fig3-v1	TRUE	N	N	N	Definitely problematic	Merge of red and green
elife-00882-fig2-v1	TRUE	N	N	N	Definitely problematic	Not enough contrast between green and orange
elife-00882-fig4-v1	TRUE	Y	N	Y	Definitely okay
elife-00882-fig6-v1	TRUE	Y	Y	Y	Definitely okay
elife-00884-fig7-v1	TRUE	N	N	N	Definitely problematic
elife-00905-fig2-v1	TRUE	Y	Y	N	Definitely okay
elife-00926-fig11-v1	FALSE				Definitely okay
elife-00940-fig5-v1	TRUE	N	N	N	Definitely problematic	Merge in Firgure D
elife-00960-fig1-v1	TRUE	Y	Y	Y	Definitely okay
elife-00960-fig3-v1	TRUE	N	N	N	Definitely problematic
elife-00960-fig5-v1	TRUE	Y	N	N	Probably problematic	Despite the contrast in Firgure B, the overlay of red and green could still be hard to distinguish
elife-00967-fig2-v1	FALSE				Gray-scale
elife-00971-fig6-v1	FALSE				Definitely okay
elife-00983-fig3-v1	FALSE				Gray-scale
elife-00994-fig3-v1	TRUE	Y	N	N	Definitely okay
elife-01008-fig6-v1	TRUE	Y	Y	N	Definitely okay
elife-01009-fig5-v1	TRUE	Y	Y	Y	Definitely okay
elife-01085-fig13-v1	TRUE	Y	Y	Y	Definitely okay
elife-01085-fig21-v1	FALSE				Definitely okay
elife-01096-fig4-v1	TRUE	Y	N	Y	Definitely okay
elife-01104-fig6-v1	FALSE				Gray-scale
elife-01120-fig4-v1	TRUE	Y	Y	Y	Definitely okay
elife-01133-fig8-v1	TRUE	N	N	N	Definitely problematic	Merge of red and green impossible to distinguish
elife-01149-fig5-v1	FALSE				Definitely okay
elife-01149-fig6-v1	FALSE				Definitely okay
elife-01157-fig2-v1	FALSE				Definitely okay
elife-01160-fig5-v1	FALSE				Definitely okay
elife-01179-fig1-v1	FALSE				Definitely okay
elife-01197-fig2-v1	TRUE	N	N	N	Definitely problematic	Merge of red and green impossible to distinguish
elife-01211-fig6-v1	TRUE	Y	Y	N	Definitely okay
elife-01222-fig2-v1	TRUE	Y	N	Y	Definitely okay
elife-01222-fig3-v1	TRUE	Y	N	N	Definitely okay
elife-01229-fig6-v1	FALSE				Gray-scale
elife-01256-fig5-v1	TRUE	Y	Y	N	Definitely okay
elife-01279-fig2-v1	TRUE	Y	N	N	Definitely okay
elife-01279-fig9-v1	TRUE	N	N	N	Definitely problematic	Green and Yellow protein in Figure A is hard to tell apart
elife-01287-fig11-v1	TRUE	Y	N	N	Definitely okay
elife-01296-fig5-v1	TRUE	Y	N	Y	Definitely okay
elife-01296-fig8-v1	TRUE	N	N	N	Definitely problematic	Look at Figure C
elife-01305-fig5-v1	FALSE				Gray-scale
elife-01308-fig2-v1	FALSE				Definitely okay
elife-01311-fig15-v1	FALSE				Definitely okay
elife-01323-fig3-v1	TRUE	Y	N	N	Probably okay	Merge has enough contrast between yellow and green.
elife-01340-fig13-v1	FALSE				Gray-scale
elife-01341-fig4-v1	TRUE	NA	NA	Y	Definitely okay
elife-01350-fig2-v1	FALSE				Gray-scale
elife-01374-fig2-v1	FALSE				Definitely okay
elife-01374-fig5-v1	FALSE				Definitely okay
elife-01402-fig3-v1	TRUE	Y	N	N	Probably okay	Figure A has green and yellow, without labels
elife-01439-fig4-v1	TRUE	Y	N	Y	Definitely okay
elife-01440-fig5-v1	FALSE				Definitely okay
elife-01479-fig5-v1	TRUE	N	N	N	Definitely problematic	See Figure F, green in the protein disappears.
elife-01483-fig8-v1	TRUE	Y	N	Y	Definitely okay
elife-01488-fig3-v1	TRUE	Y	N	Y	Definitely okay
elife-01496-fig2-v1	TRUE	N	N	N	Definitely problematic	Yellow and green are the same in the protein.
elife-01498-fig3-v1	FALSE				Definitely okay
elife-01501-fig2-v1	TRUE	Y	Y	N	Definitely okay
elife-01503-fig2-v1	TRUE	Y	Y	Y	Definitely okay
elife-01503-fig7-v1	FALSE				Definitely okay
elife-01524-fig6-v1	FALSE				Definitely okay
elife-01557-fig9-v1	TRUE	Y	Y	N	Definitely okay
elife-01569-fig5-v1	TRUE	Y	Y	Y	Definitely okay
elife-01610-fig4-v1	TRUE	Y	Y	N	Definitely okay
elife-01610-fig6-v1	FALSE				Definitely okay
elife-01610-fig9-v1	FALSE				Definitely okay
elife-01612-fig2-v1	TRUE	N	N	N	Definitely problematic
elife-01612-fig7-v1	TRUE	N	N	N	Definitely problematic
elife-01641-fig4-v1	FALSE				Definitely okay
elife-01694-fig3-v1	FALSE				Definitely okay
elife-01695-fig7-v1	TRUE	NA	Y	Y	Definitely okay
elife-01724-fig1-v1	TRUE	Y	Y	Y	Definitely okay
elife-01730-fig7-v1	FALSE				Definitely okay
elife-01739-fig9-v1	TRUE	Y	Y	N	Definitely okay	Heatmap
elife-01749-fig3-v1	FALSE				Definitely okay
elife-01808-fig5-v1	FALSE				Gray-scale
elife-01831-fig1-v1	TRUE	N	N	N	Definitely problematic
elife-01833-fig5-v1	TRUE	Y	N	N	Probably okay	Heatmap without labels
elife-01834-fig7-v1	TRUE	Y	Y	Y	Definitely okay
elife-01861-fig7-v1	TRUE	NA	NA	Y	Definitely okay
elife-01883-fig3-v1	TRUE	Y	N	Y	Definitely okay
elife-01888-fig4-v1	TRUE	N	N	N	Definitely problematic
elife-01914-fig5-v1	FALSE				Definitely okay
elife-01914-fig12-v1	TRUE	N	N	N	Definitely problematic	Green and orangish brown are too similar in Figure A
elife-01916-fig4-v1	FALSE				Definitely okay
elife-01917-fig5-v1	TRUE	Y	Y	N	Definitely okay
elife-01936-fig3-v2	TRUE	Y	Y	N	Definitely okay
elife-01939-fig6-v1	FALSE				Definitely okay
elife-01944-fig10-v1	TRUE	Y	Y	N	Definitely okay	Heatmap scale
elife-01963-fig9-v1	TRUE	N	N	N	Probably problematic	There is green on top of each bar in the graph, but it does not seem to be significant.
elife-01990-fig2-v2	FALSE				Gray-scale
elife-01993-fig5-v1	TRUE	Y	Y	Y	Definitely okay
elife-01998-fig6-v1	FALSE				Definitely okay
elife-02001-fig3-v1	TRUE	Y	N	N	Definitely okay
elife-02009-fig2-v2	TRUE	N	N	N	Definitely problematic
elife-02024-fig8-v2	TRUE	Y	Y	N	Definitely okay
elife-02042-fig6-v1	FALSE				Definitely okay
elife-02043-fig2-v2	TRUE	Y	Y	Y	Definitely okay
elife-02043-fig4-v2	FALSE				Definitely okay
elife-02057-fig3-v2	TRUE	Y	NA	N	Definitely okay	High contrast in the proteins and figures
elife-02078-fig2-v1	TRUE	Y	Y	N	Definitely okay	Heatmap
elife-02164-fig4-v2	TRUE	Y	N	Y	Definitely okay
elife-02172-fig3-v1	FALSE				Gray-scale
elife-02181-fig6-v1	TRUE	Y	N	Y	Definitely okay
elife-02184-fig5-v2	FALSE				Definitely okay
elife-02190-fig1-v1	TRUE	Y	Y	N	Definitely okay
elife-02196-fig2-v3	TRUE	Y	N	N	Definitely okay
elife-02208-fig7-v2	TRUE	Y	Y	N	Definitely okay
elife-02277-fig2-v1	FALSE				Gray-scale
elife-02313-fig7-v1	FALSE				Gray-scale
elife-02375-fig2-v2	TRUE	Y	N	N	Definitely okay	High contrast
elife-02391-fig8-v2	FALSE				Definitely okay
elife-02419-fig9-v2	FALSE				Definitely okay
elife-02439-fig2-v1	TRUE	N	N	N	Definitely problematic	Green and red overlay in Figure B.
elife-02439-fig5-v1	TRUE	N	Y	N	Definitely problematic	While they point out red spots in the merge, it is still hard to distinguish them.
elife-02440-fig2-v2	TRUE	Y	Y	N	Definitely okay	Heatmap
elife-02443-fig1-v1	TRUE	Y	N	Y	Definitely okay
elife-02451-fig1-v2	FALSE				Gray-scale
elife-02478-fig2-v2	TRUE	N	Y	N	Probably problematic	In Figure B, the labels do not helpp distinguish the different shades well.
elife-02481-fig2-v2	TRUE	Y	N	N	Definitely okay
elife-02598-fig10-v2	TRUE	Y	N	N	Definitely okay
elife-02641-fig4-v1	TRUE	Y	N	N	Definitely okay
elife-02667-fig1-v1	FALSE				Definitely okay
elife-02687-fig5-v2	TRUE	Y	Y	N	Definitely okay
elife-02734-fig6-v2	TRUE	N	N	N	Definitely problematic	See Figure C MUT3
elife-02740-fig5-v2	TRUE	NA	NA	Y	Definitely okay
elife-02740-fig6-v2	TRUE	Y	Y	N	Definitely okay
elife-02743-fig6-v1	FALSE				Definitely okay
elife-02798-fig2-v1	FALSE				Definitely okay
elife-02839-fig5-v2	FALSE				Gray-scale
elife-02848-fig1-v2	FALSE				Definitely okay
elife-02862-fig6-v2	TRUE	N	N	N	Definitely problematic
elife-02863-fig5-v1	TRUE	Y	N	N	Definitely okay
elife-02866-fig1-v1	TRUE	NA	NA	Y	Definitely okay
elife-02866-fig2-v1	TRUE	Y	N	N	Definitely okay
elife-02869-fig4-v2	FALSE				Definitely okay
elife-02875-fig3-v2	FALSE				Definitely okay
elife-02893-fig5-v2	TRUE	NA	NA	Y	Definitely okay
elife-02907-fig7-v2	FALSE				Gray-scale
elife-02923-fig3-v3	FALSE				Gray-scale
elife-02935-fig5-v2	TRUE	Y	N	N	Definitely okay
elife-02948-fig2-v2	TRUE	N	N	N	Definitely problematic
elife-02950-fig2-v1	TRUE	Y	Y	Y	Definitely okay
elife-02951-fig2-v1	TRUE	Y	N	N	Probably okay	While there is high contrast, the red and green are too close to be sure it is ok.
elife-02981-fig1-v1	FALSE				Gray-scale
elife-03007-fig6-v2	FALSE				Gray-scale
elife-03083-fig2-v1	TRUE	N	N	N	Definitely problematic
elife-03091-fig3-v1	FALSE				Definitely okay
elife-03091-fig4-v1	FALSE				Definitely okay
elife-03126-fig9-v2	TRUE	N	N	N	Definitely problematic
elife-03145-fig1-v1	FALSE				Definitely okay
elife-03145-fig6-v1	FALSE				Definitely okay
elife-03185-fig3-v1	TRUE	Y	NA	Y	Definitely okay
elife-03198-fig5-v4	FALSE				Definitely okay
elife-03198-fig7-v4	TRUE	Y	Y	Y	Definitely okay
elife-03251-fig3-v2	FALSE				Definitely okay
elife-03271-fig2-v2	TRUE	NA	NA	Y	Definitely okay
elife-03273-fig4-v2	TRUE	Y	N	N	Definitely okay
elife-03275-fig5-v2	TRUE	Y	N	N	Definitely okay
elife-03282-fig4-v2	TRUE	Y	Y	Y	Definitely okay
elife-03293-fig7-v2	FALSE				Definitely okay
elife-03372-fig3-v1	TRUE	Y	N	N	Definitely okay
elife-03383-fig5-v3	TRUE	N	N	N	Definitely problematic
elife-03385-fig7-v2	FALSE				Definitely okay
elife-03399-fig1-v2	TRUE	Y	Y	N	Definitely okay
elife-03399-fig3-v2	TRUE	N	N	N	Definitely problematic
elife-03416-fig4-v2	FALSE				Gray-scale
elife-03416-fig6-v2	FALSE				Gray-scale
elife-03422-fig4-v1	FALSE				Definitely okay
elife-03464-fig7-v1	FALSE				Definitely okay
elife-03467-fig2-v2	TRUE	N	N	N	Definitely problematic
elife-03467-fig4-v2	TRUE	Y	N	N	Probably okay	While there is a green/red merge, there is high contrast between the two.
elife-03468-fig7-v2	FALSE				Gray-scale
elife-03473-fig2-v3	FALSE				Definitely okay
elife-03522-fig2-v1	TRUE	Y	N	N	Definitely okay
elife-03528-fig1-v2	TRUE	Y	Y	Y	Definitely okay
elife-03532-fig4-v2	FALSE				Definitely okay
elife-03542-fig1-v2	TRUE	N	N	Y	Probably problematic	The two shades of red are too similar in Place Cell #
elife-03542-fig3-v2	TRUE	Y	N	N	Definitely okay
elife-03563-fig8-v2	TRUE	Y	Y	Y	Definitely okay
elife-03583-fig2-v3	TRUE	N	N	N	Definitely problematic	The alpha helicies in the proteins are too similar.
elife-03587-fig7-v1	FALSE				Definitely okay
elife-03587-fig10-v1	FALSE				Definitely okay
elife-03596-fig4-v2	TRUE	N	N	N	Definitely problematic
elife-03613-fig2-v2	TRUE	NA	NA	Y	Definitely okay
elife-03614-fig5-v2	FALSE				Definitely okay
elife-03635-fig4-v2	FALSE				Definitely okay
elife-03638-fig8-v2	TRUE	Y	Y	N	Definitely okay
elife-03641-fig3-v1	TRUE	NA	NA	Y	Definitely okay
elife-03648-fig3-v2	TRUE	N	N	N	Definitely problematic	Figure A protein
elife-03650-fig5-v1	TRUE	Y	N	Y	Definitely okay
elife-03676-fig2-v1	FALSE				Definitely okay
elife-03680-fig6-v3	TRUE	Y	Y	Y	Definitely okay
elife-03703-fig3-v2	FALSE				Definitely okay
elife-03711-fig2-v2	FALSE				Gray-scale
elife-03714-fig3-v2	TRUE	Y	N	N	Definitely okay	High contrast
elife-03737-fig9-v2	TRUE	Y	Y	N	Definitely okay
elife-03743-fig6-v1	FALSE				Gray-scale
elife-03772-fig6-v2	TRUE	Y	N	N	Definitely okay
elife-03778-fig4-v2	FALSE				Gray-scale
elife-03819-fig7-v2	TRUE	Y	N	N	Definitely okay
elife-03830-fig4-v2	FALSE				Definitely okay
elife-03842-fig4-v2	TRUE	N	N	N	Definitely problematic
elife-03892-fig2-v2	TRUE	Y	N	N	Definitely okay
elife-03895-fig1-v1	FALSE				Definitely okay
elife-03896-fig4-v2	TRUE	Y	Y	Y	Definitely okay
elife-03913-fig8-v2	TRUE	Y	N	N	Definitely okay
elife-03915-fig3-v2	TRUE	Y	N	N	Definitely okay
elife-03943-fig7-v2	TRUE	Y	N	Y	Definitely okay
elife-04000-fig4-v1	TRUE	N	N	N	Definitely problematic
elife-04006-fig1-v2	TRUE	Y	N	N	Definitely okay
elife-04069-fig10-v2	FALSE				Definitely okay
elife-04094-fig3-v2	FALSE				Definitely okay
elife-04111-fig1-v1	TRUE	Y	N	N	Definitely okay
elife-04126-fig3-v3	FALSE				Definitely okay
elife-04137-fig3-v2	TRUE	N	N	N	Definitely problematic
elife-04147-fig2-v1	TRUE	Y	Y	N	Definitely okay	Labeled heatmap
elife-04158-fig9-v2	TRUE	N	N	N	Probably problematic	Pinkish red disappears in Figure C
elife-04177-fig5-v2	FALSE				Definitely okay
elife-04207-fig1-v1	FALSE				Definitely okay
elife-04234-fig1-v2	TRUE	Y	Y	Y	Definitely okay
elife-04234-fig5-v2	FALSE				Gray-scale
elife-04241-fig4-v2	TRUE	Y	N	N	Definitely okay
elife-04241-fig11-v2	TRUE	Y	Y	Y	Definitely okay
elife-04260-fig6-v2	FALSE				Definitely okay
elife-04265-fig2-v3	TRUE	N	N	Y	Definitely problematic	See Figure C, E and F. Lack of contrast between orange and green.
elife-04265-fig10-v3	TRUE	Y	N	Y	Definitely okay
elife-04288-fig5-v1	TRUE	NA	NA	Y	Definitely okay
elife-04366-fig3-v2	TRUE	Y	N	N	Definitely okay
elife-04379-fig10-v2	FALSE				Definitely okay
elife-04380-fig8-v2	FALSE				Definitely okay
elife-04389-fig10-v2	TRUE	Y	N	N	Definitely okay	High contrast
elife-04407-fig4-v2	FALSE				Definitely okay
elife-04407-fig11-v2	TRUE	Y	Y	N	Definitely okay
elife-04433-fig1-v2	FALSE				Gray-scale
elife-04433-fig5-v2	FALSE				Gray-scale
elife-04490-fig7-v2	FALSE				Definitely okay
elife-04490-fig10-v2	FALSE				Definitely okay
elife-04493-fig6-v2	TRUE	NA	NA	Y	Definitely okay
elife-04494-fig1-v1	FALSE				Definitely okay
elife-04501-fig6-v3	TRUE	Y	N	N	Probably problematic	In Figure E, the green and yellow overlay does not have sufficient contrast
elife-04506-fig5-v2	FALSE				Definitely okay
elife-04535-fig6-v2	TRUE	Y	N	N	Definitely okay
elife-04539-fig3-v2	TRUE	Y	N	N	Definitely okay
elife-04550-fig5-v2	FALSE				Gray-scale
elife-04580-fig3-v1	TRUE	Y	Y	Y	Definitely okay
elife-04580-fig4-v1	TRUE	Y	Y	Y	Definitely okay
elife-04580-fig8-v1	TRUE	Y	Y	Y	Definitely okay
elife-04580-fig15-v1	TRUE	Y	Y	Y	Definitely okay
elife-04581-fig7-v2	TRUE	Y	Y	N	Definitely okay	Heat map
elife-04640-fig7-v1	TRUE	Y	Y	Y	Definitely okay
elife-04659-fig5-v2	FALSE				Gray-scale
elife-04660-fig6-v2	FALSE				Definitely okay
elife-04664-fig7-v2	TRUE	Y	N	N	Definitely okay
elife-04692-fig2-v2	FALSE				Definitely okay
elife-04718-fig2-v1	TRUE	N	N	N	Definitely problematic
elife-04775-fig1-v2	TRUE	Y	Y	N	Definitely okay
elife-04775-fig2-v2	FALSE				Definitely okay
elife-04875-fig2-v2	FALSE				Definitely okay
elife-04875-fig5-v2	TRUE	Y	N	N	Definitely okay
elife-04875-fig6-v2	TRUE	Y	N	N	Definitely okay
elife-04885-fig4-v2	FALSE				Definitely okay
elife-04970-fig6-v2	TRUE	Y	N	N	Definitely okay
elife-04979-fig2-v2	FALSE				Definitely okay
elife-04988-fig1-v2	TRUE	Y	N	Y	Definitely okay
elife-05005-fig3-v1	TRUE	Y	N	N	Definitely okay
elife-05007-fig5-v2	TRUE	NA	NA	Y	Definitely okay
elife-05042-fig4-v1	TRUE	Y	Y	N	Definitely okay	Heat map
elife-05042-fig6-v1	TRUE	Y	Y	N	Definitely okay	Heat map
elife-05098-fig8-v1	TRUE	Y	N	N	Definitely okay
elife-05105-fig3-v2	FALSE				Definitely okay
elife-05105-fig6-v2	FALSE				Definitely okay
elife-05116-fig1-v1	TRUE	Y	N	N	Definitely okay	Heat map
elife-05151-fig5-v2	TRUE	N	N	N	Definitely problematic
elife-05161-fig1-v1	FALSE				Definitely okay
elife-05165-fig1-v2	FALSE				Definitely okay
elife-05178-fig3-v1	FALSE				Definitely okay
elife-05255-fig8-v1	TRUE	NA	NA	Y	Definitely okay
elife-05279-fig8-v1	TRUE	Y	Y	N	Definitely okay	Heat map
elife-05322-fig5-v2	TRUE	Y	N	Y	Definitely okay
elife-05352-fig4-v2	TRUE	Y	Y	N	Definitely okay	Heat map
elife-05361-fig4-v2	TRUE	N	N	N	Definitely problematic	Figure C and J, the red color disappears
elife-05413-fig2-v2	FALSE				Definitely okay
elife-05413-fig8-v2	FALSE				Definitely okay
elife-05422-fig1-v2	TRUE	N	N	N	Definitely problematic	The green, orange, and light green in the merge are hard to distinguish
elife-05434-fig2-v1	TRUE	NA	NA	Y	Definitely okay
elife-05457-fig4-v1	TRUE	Y	Y	Y	Definitely okay
elife-05457-fig5-v1	TRUE	Y	N	Y	Definitely okay
elife-05457-fig8-v1	TRUE	Y	Y	Y	Definitely okay
elife-05462-fig5-v2	TRUE	Y	Y	Y	Definitely okay
elife-05502-fig3-v1	FALSE				Definitely okay
elife-05505-fig7-v2	FALSE				Definitely okay
elife-05521-fig1-v2	TRUE	N	N	N	Definitely problematic
elife-05534-fig7-v2	FALSE				Definitely okay
elife-05544-fig2-v2	FALSE				Definitely okay
elife-05560-fig9-v2	TRUE	Y	N	Y	Definitely okay
elife-05604-fig3-v1	TRUE	NA	NA	Y	Definitely okay
elife-05606-fig6-v1	TRUE	Y	N	Y	Definitely okay
elife-05607-fig1-v2	FALSE				Gray-scale
elife-05660-fig2-v2	FALSE				Definitely okay
elife-05660-fig4-v2	FALSE				Gray-scale
elife-05682-fig4-v1	FALSE				Definitely okay
elife-05697-fig1-v3	TRUE	Y	N	N	Probably problematic	There is overlay, but there is enough contrast between the colors
elife-05745-fig2-v1	TRUE	N	N	N	Definitely problematic
elife-05767-fig2-v2	TRUE	Y	Y	N	Definitely okay
elife-05793-fig2-v1	FALSE				Definitely okay
elife-05842-fig4-v2	FALSE				Definitely okay
elife-05842-fig7-v2	FALSE				Gray-scale
elife-05899-fig2-v2	TRUE	Y	N	Y	Definitely okay
elife-05958-fig7-v1	TRUE	Y	N	N	Probably okay	While there are enough contrast, the strands are too close to tell apart
elife-05981-fig3-v2	FALSE				Definitely okay
elife-05981-fig7-v2	FALSE				Definitely okay
elife-06056-fig6-v2	TRUE	N	N	N	Definitely problematic
elife-06068-fig4-v1	TRUE	N	N	N	Definitely problematic	While the merge is okay, the red disappears
elife-06074-fig6-v2	TRUE	Y	N	Y	Definitely okay
elife-06088-fig7-v1	TRUE	Y	N	N	Definitely okay
elife-06104-fig6-v1	TRUE	N	N	N	Definitely problematic
elife-06156-fig2-v2	TRUE	N	Y	N	Probably problematic	Although there is a merge, the important region are label
elife-06184-fig3-v1	FALSE				Definitely okay
elife-06195-fig8-v2	TRUE	Y	Y	Y	Definitely okay
elife-06203-fig7-v1	TRUE	Y	N	N	Definitely okay
elife-06250-fig5-v4	FALSE				Definitely okay
elife-06262-fig5-v2	TRUE	Y	N	N	Probably problematic	The red in Figure B hard to see
elife-06283-fig7-v2	TRUE	Y	Y	Y	Definitely okay
elife-06346-fig3-v2	FALSE				Definitely okay
elife-06346-fig7-v2	FALSE				Definitely okay
elife-06358-fig12-v2	TRUE	Y	Y	Y	Definitely okay
elife-06359-fig5-v1	FALSE				Definitely okay
elife-06376-fig4-v2	FALSE				Definitely okay
elife-06397-fig4-v3	TRUE	Y	N	N	Definitely okay
elife-06444-fig4-v2	TRUE	Y	N	N	Definitely okay	See Firgure C and D.
elife-06462-fig1-v2	TRUE	N	N	N	Definitely problematic
elife-06462-fig5-v2	TRUE	N	N	N	Definitely problematic
elife-06467-fig6-v3	TRUE	N	N	N	Definitely problematic
elife-06474-fig8-v1	TRUE	Y	N	N	Definitely okay
elife-06489-fig2-v1	TRUE	N	N	N	Definitely problematic
elife-06489-fig5-v1	TRUE	N	N	N	Definitely problematic
elife-06500-fig4-v2	TRUE	N	N	N	Definitely problematic
elife-06500-fig5-v2	TRUE	N	N	N	Definitely problematic
elife-06505-fig8-v2	FALSE				Definitely okay
elife-06505-fig10-v2	FALSE				Gray-scale
elife-06516-fig3-v3	TRUE	Y	N	Y	Definitely okay
elife-06516-fig7-v2	TRUE	NA	NA	Y	Definitely okay
elife-06541-fig3-v1	FALSE				Definitely okay
elife-06541-fig10-v1	TRUE	N	N	Y	Definitely okay
elife-06545-fig3-v2	FALSE				Definitely okay
elife-06554-fig1-v1	TRUE	Y	Y	Y	Definitely okay
elife-06554-fig9-v1	TRUE	N	N	N	Definitely problematic	Protein - not sufficient contrast between the green and the yellow
elife-06567-fig3-v2	TRUE	N	N	N	Definitely problematic
elife-06576-fig2-v1	TRUE	Y	N	Y	Definitely okay
elife-06619-fig6-v1	TRUE	Y	Y	N	Definitely okay
elife-06670-fig1-v2	FALSE				Definitely okay
elife-06671-fig5-v2	FALSE				Definitely okay
elife-06683-fig9-v2	FALSE				Gray-scale
elife-06694-fig16-v1	FALSE				Definitely okay
elife-06734-fig5-v2	FALSE				Definitely okay
elife-06807-fig2-v1	TRUE	N	N	N	Definitely problematic
elife-06808-fig7-v2	TRUE	Y	N	Y	Definitely okay
elife-06821-fig2-v3	TRUE	Y	Y	Y	Definitely okay
elife-06914-fig7-v2	TRUE	Y	N	Y	Definitely okay
elife-06925-fig2-v2	TRUE	Y	Y	Y	Definitely okay
elife-06925-fig5-v2	TRUE	Y	Y	Y	Definitely okay
elife-06967-fig1-v2	TRUE	Y	N	Y	Definitely okay
elife-07025-fig1-v2	TRUE	Y	Y	N	Definitely okay
elife-07051-fig5-v2	TRUE	N	N	N	Definitely problematic
elife-07068-fig3-v1	TRUE	N	N	N	Definitely problematic	Although has label, it still hard to tell what it pointing at
elife-07068-fig4-v1	TRUE	Y	Y	Y	Definitely okay
elife-07091-fig4-v1	TRUE	N	N	N	Definitely problematic
elife-07101-fig4-v1	TRUE	Y	N	N	Probably okay	While it is a overlay, there is enough contrast to tell the red and green apart
elife-07122-fig3-v1	TRUE	Y	N	N	Definitely okay
elife-07141-fig3-v1	TRUE	Y	N	N	Probably okay	There is enough contrast, but the distance still makes it hard to understand
elife-07141-fig6-v1	FALSE				Definitely okay
elife-07166-fig5-v2	FALSE				Gray-scale
elife-07186-fig5-v2	FALSE				Definitely okay
elife-07187-fig4-v2	TRUE	Y	N	Y	Definitely okay
elife-07224-fig6-v1	TRUE	N	NA	N	Probably problematic	While each color has a different shapes, there is no labels for the shapes
elife-07242-fig5-v2	TRUE	NA	NA	Y	Definitely okay
elife-07277-fig6-v1	FALSE				Definitely okay
elife-07295-fig1-v2	TRUE	Y	Y	Y	Definitely okay
elife-07295-fig2-v2	FALSE				Definitely okay
elife-07343-fig1-v2	TRUE	N	N	N	Definitely problematic	Although has label, it still hard to tell what it pointing at
elife-07389-fig1-v2	FALSE				Definitely okay
elife-07404-fig1-v1	FALSE				Definitely okay
elife-07405-fig1-v2	TRUE	Y	Y	N	Definitely okay	Heat scale
elife-07410-fig2-v2	FALSE				Definitely okay
elife-07423-fig17-v3	TRUE	NA	NA	Y	Definitely okay
elife-07433-fig4-v2	TRUE	Y	N	N	Probably okay	While the protein has enough contrast, it still hard to tell what is what
elife-07454-fig2-v4	FALSE				Gray-scale
elife-07454-fig5-v4	FALSE				Definitely okay
elife-07486-fig8-v2	FALSE				Definitely okay
elife-07616-fig2-v1	FALSE				Definitely okay
elife-07635-fig3-v2	TRUE	Y	Y	N	Definitely okay	Heat map
elife-07635-fig5-v2	TRUE	Y	N	Y	Definitely okay
elife-07635-fig7-v2	TRUE	Y	N	N	Definitely okay
elife-07736-fig2-v2	TRUE	N	N	N	Definitely problematic	There is a somewhat heat scale on Figure A, but the color are too close to be able to distinguish
elife-07759-fig6-v2	TRUE	Y	N	N	Definitely okay
elife-07777-fig1-v2	TRUE	N	N	N	Definitely problematic
elife-07811-fig2-v1	FALSE				Definitely okay
elife-07811-fig3-v1	TRUE	Y	Y	N	Definitely okay	Heat map labeled
elife-07830-fig1-v2	TRUE	N	N	N	Definitely problematic
elife-07830-fig8-v2	FALSE				Definitely okay
elife-07834-fig1-v1	TRUE	Y	NA	N	Probably okay	It is a merge, but the only red is the red arrow that is easily distinguishable
elife-07861-fig1-v2	TRUE	Y	N	Y	Definitely okay
elife-07861-fig7-v2	FALSE				Definitely okay
elife-07897-fig6-v1	TRUE	N	N	N	Definitely problematic
elife-07919-fig8-v2	TRUE	Y	N	N	Probably okay	The green and orange are very similar
elife-07938-fig7-v2	TRUE	Y	N	N	Definitely okay
elife-07939-fig9-v2	TRUE	Y	N	N	Definitely okay
elife-07966-fig1-v2	TRUE	Y	NA	Y	Definitely okay
elife-07966-fig4-v2	TRUE	Y	N	Y	Definitely okay
elife-07969-fig1-v2	FALSE				Definitely okay
elife-07969-fig2-v2	FALSE				Definitely okay
elife-08088-fig3-v2	TRUE	Y	Y	Y	Definitely okay
elife-08133-fig5-v1	FALSE				Gray-scale
elife-08150-fig3-v1	FALSE				Gray-scale
elife-08150-fig4-v1	FALSE				Definitely okay
elife-08153-fig1-v2	TRUE	NA	NA	Y	Definitely okay
elife-08160-fig4-v2	TRUE	NA	NA	Y	Definitely okay
elife-08174-fig3-v1	TRUE	N	N	N	Definitely problematic
elife-08193-fig1-v2	TRUE	Y	N	N	Definitely okay
elife-08261-fig4-v2	TRUE	Y	N	N	Definitely okay	Merge but sufficiant contrast
elife-08287-fig8-v2	TRUE	N	N	N	Definitely problematic
elife-08314-fig5-v3	TRUE	N	N	N	Definitely problematic
elife-08378-fig1-v2	FALSE				Definitely okay
elife-08378-fig4-v2	TRUE	Y	N	Y	Definitely okay
elife-08384-fig3-v2	FALSE				Definitely okay
elife-08407-fig10-v1	FALSE				Definitely okay
elife-08413-fig1-v1	TRUE	Y	N	N	Probably okay	While there is contrast, the red and green are very close to each other
elife-08413-fig4-v1	TRUE	Y	Y	Y	Definitely okay
elife-08413-fig6-v1	TRUE	Y	Y	Y	Definitely okay
elife-08413-fig8-v1	TRUE	N	N	N	Definitely problematic	See Figure B merge
elife-08417-fig5-v2	FALSE				Definitely okay
elife-08422-fig2-v2	TRUE	N	N	N	Definitely problematic	While has arrow point out red, one can't see the red
elife-08422-fig4-v2	TRUE	N	N	N	Definitely problematic
elife-08428-fig2-v2	TRUE	Y	Y	N	Definitely okay
elife-08440-fig2-v2	TRUE	Y	N	N	Definitely okay
elife-08445-fig3-v1	TRUE	Y	Y	N	Definitely okay	Heat map
elife-08467-fig3-v1	TRUE	N	Y	N	Probably problematic	In Figure E the control side, the red and green are too similar
elife-08493-fig2-v2	TRUE	N	N	N	Definitely problematic
elife-08494-fig2-v1	TRUE	Y	Y	N	Definitely okay	Heat map
elife-08504-fig3-v2	TRUE	Y	N	N	Probably okay	While there are contrast, the lack of label makes it harder to read
elife-08595-fig2-v2	TRUE	Y	N	Y	Definitely okay
elife-08646-fig4-v2	TRUE	Y	N	Y	Definitely okay
elife-08647-fig5-v2	TRUE	NA	NA	Y	Definitely okay
elife-08647-fig6-v2	TRUE	Y	Y	Y	Definitely okay
elife-08648-fig3-v2	FALSE				Definitely okay
elife-08649-fig5-v2	TRUE	N	N	N	Definitely problematic
elife-08666-fig1-v2	TRUE	Y	N	Y	Definitely okay
elife-08687-fig4-v2	FALSE				Definitely okay
elife-08688-fig5-v2	TRUE	NA	NA	Y	Definitely okay
elife-08688-fig9-v2	TRUE	Y	N	N	Definitely okay
elife-08733-fig1-v2	TRUE	NA	NA	Y	Definitely okay
elife-08817-fig7-v2	TRUE	N	N	N	Definitely problematic
elife-08827-fig6-v2	TRUE	N	N	N	Definitely problematic
elife-08827-fig8-v2	TRUE	Y	NA	N	Definitely okay
elife-08890-fig7-v2	TRUE	Y	N	Y	Definitely okay
elife-08898-fig1-v2	TRUE	Y	N	N	Definitely okay
elife-08904-fig6-v2	TRUE	Y	Y	N	Definitely okay	Heatmap
elife-08941-fig4-v2	TRUE	Y	Y	Y	Definitely okay
elife-08961-fig3-v1	FALSE				Definitely okay
elife-08969-fig3-v2	TRUE	Y	N	N	Definitely okay
elife-08996-fig8-v2	TRUE	Y	N	Y	Definitely okay
elife-08996-fig10-v2	TRUE	Y	N	Y	Definitely okay
elife-09017-fig5-v2	TRUE	NA	NA	Y	Definitely okay
elife-09031-fig4-v2	TRUE	Y	N	N	Definitely okay
elife-09031-fig6-v2	TRUE	NA	NA	Y	Definitely okay
elife-09083-fig1-v2	TRUE	N	N	N	Definitely problematic
elife-09100-fig3-v2	TRUE	Y	N	N	Definitely okay
elife-09102-fig5-v2	TRUE	NA	NA	Y	Definitely okay
elife-09115-fig4-v2	FALSE				Definitely okay
elife-09148-fig8-v1	TRUE	Y	N	N	Probably okay	There is enough contrast between red and green in the merge, but the red and purple may be problematic
elife-09158-fig3-v1	FALSE				Gray-scale
elife-09181-fig3-v2	TRUE	Y	Y	Y	Definitely okay
elife-09183-fig1-v1	FALSE				Definitely okay
elife-09206-fig4-v1	TRUE	Y	NA	N	Definitely okay	The only red is in the pointers
elife-09214-fig2-v2	FALSE				Definitely okay
elife-09224-fig1-v3	TRUE	Y	Y	Y	Definitely okay
elife-09266-fig5-v2	TRUE	Y	N	N	Definitely okay
elife-09266-fig7-v2	TRUE	Y	N	N	Probably okay	Figure A has a heatmap without a label, and there are too many close lines in the linegraph to easily read it.
elife-09268-fig1-v3	TRUE	NA	NA	Y	Definitely okay
elife-09269-fig3-v1	TRUE	NA	NA	Y	Definitely okay
elife-09343-fig7-v2	FALSE				Definitely okay
elife-09347-fig1-v1	TRUE	Y	Y	N	Definitely okay
elife-09373-fig3-v2	TRUE	N	N	N	Definitely problematic
elife-09394-fig1-v1	TRUE	Y	N	N	Definitely okay	Figure A has a light spectrum
elife-09419-fig1-v2	TRUE	N	Y	N	Definitely problematic	Figure A has both green and red
elife-09431-fig2-v2	TRUE	Y	N	Y	Definitely okay
elife-09531-fig7-v1	TRUE	Y	Y	Y	Definitely okay
elife-09560-fig19-v1	FALSE				Definitely okay
elife-09561-fig5-v1	FALSE				Gray-scale
elife-09579-fig1-v2	TRUE	N	N	Y	Probably problematic	In Figure A, the red and green and brown are too similar in the simulated image.
elife-09580-fig1-v2	TRUE	Y	N	N	Definitely okay
elife-09580-fig10-v2	TRUE	Y	N	N	Definitely okay
elife-09584-fig9-v1	TRUE	N	N	N	Definitely problematic
elife-09600-fig5-v2	FALSE				Definitely okay
elife-09623-fig3-v2	FALSE				Definitely okay
elife-09638-fig2-v2	TRUE	Y	Y	N	Definitely okay
elife-09648-fig6-v1	FALSE				Definitely okay
elife-09672-fig1-v3	TRUE	Y	Y	N	Definitely okay
elife-09672-fig7-v2	TRUE	Y	Y	Y	Definitely okay
elife-09771-fig3-v3	TRUE	Y	N	N	Definitely okay
elife-09771-fig4-v3	TRUE	Y	N	Y	Definitely okay
elife-09861-fig3-v3	TRUE	Y	Y	N	Definitely okay
elife-09906-fig2-v2	TRUE	Y	Y	Y	Definitely okay
elife-09906-fig6-v2	TRUE	Y	N	N	Definitely okay
elife-09906-fig8-v2	FALSE				Definitely okay
elife-09946-fig1-v2	TRUE	N	N	N	Definitely problematic
elife-09946-fig2-v3	TRUE	N	N	N	Definitely problematic
elife-09946-fig3-v2	TRUE	N	N	N	Definitely problematic
elife-10013-fig2-v1	TRUE	Y	N	Y	Definitely okay
elife-10027-fig5-v3	TRUE	N	N	N	Definitely problematic	In the protein in Figure A, the yellow and green are too similar.
elife-10031-fig1-v2	FALSE				Definitely okay
elife-10031-fig4-v2	FALSE				Definitely okay
elife-10032-fig6-v2	FALSE				Definitely okay
elife-10032-fig7-v2	TRUE	Y	N	Y	Definitely okay
elife-10042-fig1-v2	FALSE				Definitely okay
elife-10047-fig6-v2	TRUE	N	N	N	Definitely problematic	Red disappears in Figure C
elife-10067-fig2-v2	FALSE				Definitely okay
elife-10094-fig4-v2	FALSE				Definitely okay
elife-10094-fig10-v2	TRUE	Y	N	N	Probably okay	Heatmap without labels.
elife-10110-fig3-v1	TRUE	NA	NA	Y	Definitely okay
elife-10111-fig1-v2	TRUE	N	N	N	Definitely problematic
elife-10134-fig7-v1	TRUE	Y	N	Y	Definitely okay
elife-10140-fig2-v3	TRUE	NA	NA	Y	Definitely okay
elife-10150-fig5-v2	TRUE	N	N	N	Definitely problematic	The light pink, light blue, and gray all morph into one
elife-10180-fig2-v2	TRUE	N	N	N	Definitely problematic	The orange and green in the protein in Figure A are too similar
elife-10230-fig6-v2	TRUE	Y	N	N	Probably okay	Figure C has a merge, but green and red are different enough
elife-10365-fig4-v3	TRUE	Y	Y	N	Definitely okay
elife-10421-fig1-v2	TRUE	Y	Y	Y	Definitely okay
elife-10473-fig1-v1	TRUE	Y	N	N	Definitely okay
elife-10473-fig2-v1	TRUE	Y	N	N	Definitely okay
elife-10501-fig7-v2	FALSE				Definitely okay
elife-10509-fig3-v1	FALSE				Definitely okay
elife-10514-fig3-v2	FALSE				Gray-scale
elife-10557-fig6-v1	TRUE	Y	N	N	Definitely okay
elife-10561-fig4-v1	TRUE	N	N	N	Definitely problematic
elife-10592-fig5-v3	FALSE				Definitely okay
elife-10606-fig2-v3	TRUE	Y	N	N	Definitely okay
elife-10647-fig2-v3	FALSE				Definitely okay
elife-10647-fig3-v3	TRUE	Y	N	N	Definitely okay
elife-10766-fig1-v2	TRUE	Y	Y	N	Definitely okay
elife-10774-fig3-v3	TRUE	Y	N	Y	Definitely okay
elife-10785-fig1-v1	TRUE	Y	N	Y	Definitely okay
elife-10820-fig5-v1	TRUE	Y	N	N	Probably problematic	In Figure A, the red fades into the black
elife-10856-fig5-v2	FALSE				Definitely okay
elife-10870-fig2-v2	TRUE	N	N	N	Definitely problematic
elife-10955-fig1-v3	FALSE				Definitely okay
elife-10989-fig2-v2	TRUE	Y	N	N	Definitely okay
elife-11031-fig2-v1	TRUE	Y	Y	Y	Definitely okay
elife-11058-fig5-v3	FALSE				Definitely okay
elife-11102-fig6-v2	FALSE				Definitely okay
elife-11147-fig7-v2	TRUE	Y	Y	N	Definitely okay
elife-11154-fig4-v1	FALSE				Definitely okay
elife-11181-fig5-v1	TRUE	NA	NA	Y	Definitely okay
elife-11182-fig1-v2	TRUE	Y	N	N	Definitely okay
elife-11188-fig1-v3	TRUE	NA	NA	Y	Definitely okay
elife-11189-fig2-v2	TRUE	Y	Y	N	Definitely okay
elife-11205-fig6-v2	FALSE				Definitely okay
elife-11273-fig2-v1	TRUE	Y	N	N	Definitely okay
elife-11282-fig2-v2	TRUE	Y	N	N	Probably okay	While there is enough contrast, the sheer number of color makes it hard to distinguish
elife-11282-fig3-v2	TRUE	Y	N	N	Probably okay	While there is enough contrast, the sheer number of color makes it hard to distinguish
elife-11285-fig1-v1	FALSE				Definitely okay
elife-11288-fig7-v2	TRUE	Y	N	Y	Definitely okay
elife-11297-fig2-v3	TRUE	Y	N	N	Definitely okay
elife-11305-fig1-v1	TRUE	N	N	N	Definitely problematic	See Figure A
elife-11315-fig2-v2	FALSE				Definitely okay
elife-11324-fig6-v2	TRUE	N	N	N	Definitely problematic
elife-11346-fig3-v2	FALSE				Definitely okay
elife-11389-fig7-v3	FALSE				Definitely okay
elife-11405-fig6-v1	TRUE	N	N	N	Definitely problematic	In Figure G merge, the red seem to fade
elife-11405-fig10-v1	TRUE	N	N	N	Definitely problematic
elife-11405-fig12-v1	TRUE	N	N	N	Definitely problematic	See zoom in Figure A
elife-11479-fig3-v2	TRUE	N	N	N	Definitely problematic
elife-11571-fig3-v2	TRUE	Y	Y	N	Definitely okay	Heat map
elife-11588-fig5-v2	TRUE	N	N	N	Definitely problematic
elife-11588-fig8-v2	TRUE	NA	NA	Y	Definitely okay
elife-11611-fig8-v2	FALSE				Definitely okay
elife-11627-fig4-v1	TRUE	Y	Y	N	Probably okay	Even though have enough contrast, the merge of red and green still makes it hard to see
elife-11752-fig3-v2	FALSE				Definitely okay
elife-11752-fig6-v2	TRUE	Y	N	Y	Definitely okay
elife-11815-fig2-v2	FALSE				Definitely okay
elife-11859-fig6-v2	FALSE				Definitely okay
elife-11878-fig3-v1	TRUE	Y	Y	N	Definitely okay
elife-11994-fig7-v2	FALSE				Definitely okay
elife-12010-fig9-v2	FALSE				Definitely okay
elife-12024-fig6-v3	FALSE				Definitely okay
elife-12029-fig8-v4	FALSE				Definitely okay
elife-12034-fig3-v1	TRUE	NA	NA	Y	Definitely okay
elife-12039-fig4-v2	TRUE	Y	NA	Y	Definitely okay
elife-12040-fig2-v1	TRUE	Y	N	Y	Definitely okay
elife-12047-fig4-v3	FALSE				Definitely okay
elife-12059-fig4-v1	FALSE				Definitely okay
elife-12059-fig6-v3	FALSE				Definitely okay
elife-12059-fig9-v3	TRUE	Y	N	Y	Definitely okay
elife-12059-fig12-v1	TRUE	Y	N	N	Definitely okay
elife-12081-fig5-v1	FALSE				Definitely okay
elife-12094-fig6-v3	TRUE	Y	Y	Y	Definitely okay
elife-12115-fig2-v1	TRUE	Y	N	Y	Definitely okay
elife-12125-fig4-v3	TRUE	Y	N	N	Definitely okay
elife-12151-fig4-v2	TRUE	N	N	N	Definitely problematic
elife-12167-fig5-v2	TRUE	N	N	N	Definitely problematic
elife-12177-fig1-v2	TRUE	Y	Y	Y	Definitely okay
elife-12188-fig2-v2	TRUE	Y	N	N	Definitely okay	Heat map without label, but really good contrast
elife-12192-fig3-v2	TRUE	Y	N	N	Definitely okay
elife-12192-fig4-v2	FALSE				Definitely okay
elife-12217-fig1-v2	TRUE	Y	N	N	Probably okay	While there is contrast, it still really hard to tell what color correlate to what label
elife-12217-fig2-v1	FALSE				Definitely okay
elife-12278-fig1-v1	TRUE	Y	N	Y	Definitely okay
elife-12435-fig2-v2	FALSE				Definitely okay
elife-12435-fig7-v2	TRUE	Y	Y	N	Definitely okay	Heat map with label
elife-12548-fig4-v2	TRUE	Y	Y	Y	Definitely okay
elife-12552-fig7-v2	FALSE				Definitely okay
elife-12559-fig2-v2	FALSE				Definitely okay
elife-12559-fig4-v2	TRUE	Y	N	N	Probably problematic	There is bearly enough contrast in Figures C and D
elife-12577-fig2-v2	FALSE				Definitely okay
elife-12613-fig4-v1	TRUE	Y	Y	N	Definitely okay
elife-12748-fig1-v2	TRUE	N	N	Y	Definitely problematic	Lack of contrast between orange and green in Figure B and D
elife-12748-fig3-v2	TRUE	N	N	Y	Definitely problematic	Lack of contrast between orange and green in Figure C and D
elife-12785-fig8-v2	TRUE	Y	Y	N	Definitely okay
elife-12792-fig1-v3	FALSE				Gray-scale
elife-12856-fig4-v2	TRUE	Y	Y	Y	Definitely okay
elife-12880-fig2-v2	FALSE				Definitely okay
elife-12902-fig3-v3	FALSE				Definitely okay
elife-12917-fig7-v3	TRUE	Y	Y	N	Definitely okay
elife-12977-fig4-v3	FALSE				Definitely okay
elife-12993-fig1-v1	TRUE	Y	N	N	Definitely okay
elife-12994-fig2-v2	TRUE	Y	N	Y	Definitely okay
elife-13065-fig3-v1	FALSE				Definitely okay
elife-13065-fig6-v1	FALSE				Definitely okay
elife-13087-fig3-v1	TRUE	Y	Y	N	Definitely okay
elife-13098-fig7-v2	TRUE	Y	Y	Y	Definitely okay
elife-13135-fig3-v2	FALSE				Definitely okay
elife-13152-fig8-v2	TRUE	Y	N	N	Probably okay	While there is enough contrast, the distance makes it hard to distinguish
elife-13214-fig3-v1	TRUE	Y	Y	Y	Definitely okay
elife-13222-fig4-v3	FALSE				Definitely okay
elife-13222-fig9-v3	FALSE				Definitely okay
elife-13232-fig2-v2	TRUE	Y	Y	N	Definitely okay
elife-13238-fig4-v2	TRUE	Y	N	Y	Definitely okay
elife-13254-fig1-v2	TRUE	Y	Y	N	Definitely okay
elife-13254-fig2-v2	TRUE	Y	Y	Y	Definitely okay
elife-13254-fig3-v1	FALSE				Definitely okay
elife-13273-fig6-v1	TRUE	Y	N	Y	Definitely okay
elife-13292-fig2-v2	TRUE	Y	Y	N	Definitely okay
elife-13292-fig7-v2	TRUE	NA	NA	Y	Definitely okay
elife-13343-fig7-v3	TRUE	N	N	N	Definitely problematic
elife-13356-fig4-v1	TRUE	Y	N	N	Definitely okay
elife-13388-fig1-v1	TRUE	Y	N	Y	Definitely okay
elife-13399-fig9-v1	TRUE	N	N	N	Definitely problematic
elife-13399-fig10-v1	TRUE	N	N	N	Definitely problematic
elife-13405-fig8-v2	TRUE	Y	N	Y	Definitely okay
elife-13410-fig5-v1	TRUE	Y	N	Y	Definitely okay
elife-13426-fig6-v1	FALSE				Definitely okay
elife-13446-fig7-v2	TRUE	Y	N	Y	Definitely okay
elife-13451-fig5-v2	TRUE	N	Y	N	Definitely problematic	Even though there is labels on the protein, one can't tell whether it is SM or DA.
elife-13463-fig1-v2	TRUE	N	N	N	Definitely problematic
elife-13550-fig1-v2	TRUE	Y	N	N	Probably okay	High contrast in Figure F
elife-13567-fig5-v1	TRUE	Y	N	Y	Definitely okay
elife-13571-fig2-v3	TRUE	Y	N	N	Definitely okay
elife-13571-fig9-v3	TRUE	N	N	N	Definitely problematic
elife-13715-fig2-v2	TRUE	N	N	N	Definitely problematic	The blue and pink do not have enough contrast
elife-13764-fig2-v2	TRUE	NA	NA	Y	Definitely okay
elife-13764-fig3-v2	TRUE	Y	N	Y	Definitely okay
elife-13824-fig5-v2	TRUE	Y	N	Y	Definitely okay
elife-13834-fig3-v2	TRUE	N	N	N	Definitely problematic
elife-13909-fig5-v2	TRUE	Y	Y	Y	Definitely okay
elife-13926-fig6-v2	TRUE	Y	N	Y	Definitely okay
elife-13941-fig6-v1	TRUE	Y	N	N	Definitely okay
elife-13943-fig1-v3	TRUE	N	N	N	Definitely problematic
elife-14012-fig4-v1	FALSE				Definitely okay
elife-14029-fig1-v4	FALSE				Definitely okay
elife-14107-fig10-v3	FALSE				Definitely okay
elife-14120-fig4-v1	TRUE	NA	NA	Y	Definitely okay
elife-14137-fig7-v1	FALSE				Definitely okay
elife-14158-fig3-v1	TRUE	N	N	N	Definitely problematic	Figure C and A, the yellow and green on the protein appears to be the same
elife-14158-fig7-v3	TRUE	N	N	N	Definitely problematic	Figure C and A, the yellow and green on the protein appears to be the same
elife-14170-fig4-v2	TRUE	Y	Y	N	Definitely okay	Heat map
elife-14170-fig12-v2	TRUE	N	N	N	Definitely problematic
elife-14175-fig4-v1	FALSE				Definitely okay
elife-14175-fig5-v1	FALSE				Definitely okay
elife-14199-fig3-v2	FALSE				Definitely okay
elife-14203-fig1-v2	TRUE	N	N	N	Definitely problematic
elife-14216-fig3-v2	FALSE				Gray-scale
elife-14222-fig5-v1	TRUE	N	N	N	Definitely problematic
elife-14228-fig1-v1	TRUE	Y	Y	Y	Definitely okay
elife-14243-fig8-v2	TRUE	Y	N	Y	Definitely okay
elife-14313-fig4-v1	TRUE	Y	N	N	Definitely okay
elife-14313-fig5-v1	TRUE	Y	N	N	Probably okay	While Figure A may be hard to tell, there is enough contrast to tell the orange, green and yellow.
elife-14315-fig5-v2	FALSE				Definitely okay
elife-14470-fig9-v2	TRUE	Y	N	Y	Definitely okay
elife-14599-fig2-v2	FALSE				Definitely okay
elife-14599-fig8-v2	TRUE	NA	NA	Y	Definitely okay
elife-14625-fig10-v2	FALSE				Definitely okay
elife-14625-fig11-v3	FALSE				Definitely okay
elife-14692-fig1-v4	TRUE	Y	N	Y	Definitely okay
elife-14692-fig4-v4	TRUE	Y	N	N	Definitely okay
elife-14694-fig2-v1	FALSE				Definitely okay
elife-14694-fig6-v1	FALSE				Definitely okay
elife-14712-fig2-v1	FALSE				Definitely okay
elife-14713-fig1-v2	FALSE				Definitely okay
elife-14713-fig3-v2	FALSE				Definitely okay
elife-14730-fig3-v3	TRUE	Y	Y	Y	Definitely okay
elife-14740-fig8-v2	TRUE	NA	NA	Y	Definitely okay
elife-14846-fig1-v2	FALSE				Definitely okay
elife-14908-fig4-v2	TRUE	Y	N	Y	Definitely okay
elife-15018-fig3-v1	TRUE	Y	N	N	Definitely okay
elife-15075-fig1-v2	FALSE				Definitely okay
elife-15075-fig7-v2	FALSE				Definitely okay
elife-15099-fig3-v2	TRUE	Y	Y	N	Definitely okay
elife-15104-fig3-v2	FALSE				Definitely okay
elife-15106-fig5-v2	FALSE				Definitely okay
elife-15129-fig1-v2	FALSE				Definitely okay
elife-15155-fig4-v1	TRUE	Y	N	N	Definitely okay
elife-15159-fig7-v2	FALSE				Definitely okay
elife-15161-fig4-v1	TRUE	Y	N	N	Definitely okay
elife-15161-fig6-v1	FALSE				Definitely okay
elife-15190-fig6-v4	TRUE	Y	N	N	Definitely okay
elife-15192-fig5-v2	FALSE				Definitely okay
elife-15251-fig1-v3	TRUE	Y	N	N	Definitely okay	Heat map with out label but enough contrast
elife-15251-fig9-v3	TRUE	N	N	N	Definitely problematic
elife-15258-fig6-v2	TRUE	N	N	N	Definitely problematic
elife-15266-fig2-v1	TRUE	Y	Y	Y	Definitely okay
elife-15275-fig4-v2	FALSE				Gray-scale
elife-15316-fig6-v2	FALSE				Definitely okay
elife-15416-fig4-v1	FALSE				Definitely okay
elife-15447-fig6-v2	FALSE				Definitely okay
elife-15537-fig2-v2	TRUE	N	Y	N	Probably problematic	While it is label in Figure A, the lack of contrast makes it hard to distinguish
elife-15545-fig1-v5	TRUE	Y	N	N	Definitely okay
elife-15545-fig5-v4	FALSE				Definitely okay
elife-15564-fig4-v3	FALSE				Gray-scale
elife-15598-fig1-v2	TRUE	Y	N	N	Probably problematic	The green and orange in the protein are to similar
elife-15598-fig3-v2	TRUE	Y	N	N	Probably okay	The green and orange in the protein may be too similar
elife-15600-fig5-v2	FALSE				Definitely okay
elife-15675-fig1-v2	TRUE	Y	N	N	Definitely okay
elife-15691-fig4-v1	FALSE				Definitely okay
elife-15716-fig5-v2	TRUE	Y	N	Y	Definitely okay
elife-15718-fig10-v2	TRUE	Y	NA	Y	Definitely okay
elife-15744-fig5-v1	TRUE	N	N	N	Definitely problematic	In Figure J, the red disappear into the black
elife-15784-fig3-v2	TRUE	N	N	N	Definitely problematic
elife-15784-fig8-v2	FALSE				Definitely okay
elife-15886-fig7-v2	TRUE	Y	N	N	Definitely okay
elife-15890-fig2-v3	TRUE	NA	NA	Y	Definitely okay
elife-15890-fig4-v2	TRUE	NA	NA	Y	Definitely okay
elife-15910-fig1-v2	TRUE	Y	Y	N	Definitely okay
elife-15915-fig3-v2	TRUE	Y	N	N	Probably okay	While there is contrast in Figure C, it may still be hard to distinguish
elife-15986-fig3-v4	TRUE	Y	Y	N	Definitely okay
elife-15986-fig6-v3	TRUE	Y	N	N	Definitely okay
elife-16039-fig1-v2	TRUE	NA	NA	Y	Definitely okay
elife-16039-fig3-v2	FALSE				Definitely okay
elife-16039-fig4-v2	FALSE				Definitely okay
elife-16070-fig12-v3	FALSE				Definitely okay
elife-16072-fig4-v2	FALSE				Definitely okay
elife-16088-fig9-v1	TRUE	Y	Y	Y	Definitely okay
elife-16177-fig7-v2	TRUE	Y	Y	Y	Definitely okay
elife-16269-fig5-v3	TRUE	Y	N	Y	Definitely okay
elife-16309-fig2-v2	TRUE	Y	Y	N	Definitely okay	Heatmap
elife-16349-fig8-v1	TRUE	Y	Y	Y	Definitely okay
elife-16351-fig2-v2	FALSE				Definitely okay
elife-16370-fig1-v2	TRUE	Y	N	N	Probably okay	Figure F has overlay, but there is likely sufficent contrast between red and green.
elife-16370-fig3-v2	TRUE	N	N	N	Definitely problematic
elife-16371-fig4-v2	FALSE				Definitely okay
elife-16409-fig6-v2	FALSE				Definitely okay
elife-16415-fig2-v2	FALSE				Definitely okay
elife-16472-fig5-v1	FALSE				Definitely okay
elife-16475-fig4-v2	TRUE	Y	N	N	Definitely okay
elife-16519-fig1-v2	FALSE				Definitely okay
elife-16550-fig6-v1	TRUE	Y	Y	N	Definitely okay
elife-16582-fig9-v2	TRUE	Y	Y	Y	Definitely okay
elife-16624-fig10-v1	TRUE	NA	NA	Y	Definitely okay
elife-16654-fig10-v2	TRUE	Y	Y	Y	Definitely okay
elife-16747-fig3-v1	TRUE	Y	Y	Y	Definitely okay
elife-16777-fig5-v2	FALSE				Definitely okay
elife-16797-fig4-v1	TRUE	Y	Y	Y	Definitely okay
elife-16836-fig3-v2	FALSE				Definitely okay
elife-16879-fig7-v2	TRUE	Y	N	N	Definitely okay
elife-16886-fig6-v2	TRUE	Y	N	N	Definitely okay
elife-16937-fig6-v1	FALSE				Definitely okay
elife-16940-fig3-v2	TRUE	Y	N	N	Definitely okay
elife-16962-fig6-v1	FALSE				Definitely okay
elife-16965-fig3-v3	TRUE	Y	Y	Y	Definitely okay
elife-16965-fig4-v3	TRUE	NA	NA	Y	Definitely okay
elife-17047-fig1-v1	TRUE	N	N	N	Definitely problematic	In Figure D, the orange and red line are far too similar.
elife-17061-fig5-v1	TRUE	N	N	N	Definitely problematic
elife-17096-fig4-v2	FALSE				Definitely okay
elife-17111-fig5-v1	TRUE	N	N	N	Definitely problematic
elife-17111-fig9-v1	FALSE				Gray-scale
elife-17126-fig3-v1	TRUE	NA	NA	Y	Definitely okay
elife-17159-fig9-v2	TRUE	Y	Y	N	Definitely okay
elife-17171-fig5-v1	TRUE	N	N	N	Definitely problematic
elife-17200-fig4-v2	TRUE	N	N	N	Definitely problematic
elife-17214-fig7-v1	FALSE				Definitely okay
elife-17240-fig1-v3	TRUE	Y	Y	Y	Definitely okay
elife-17243-fig3-v2	FALSE				Definitely okay
elife-17256-fig5-v2	TRUE	Y	Y	N	Definitely okay	Heatscale
elife-17328-fig2-v1	FALSE				Definitely okay
elife-17421-fig6-v2	FALSE				Definitely okay
elife-17462-fig2-v2	TRUE	NA	NA	Y	Definitely okay
elife-17505-fig2-v2	TRUE	Y	Y	N	Definitely okay
elife-17536-fig5-v2	TRUE	NA	NA	Y	Definitely okay
elife-17589-fig5-v2	TRUE	Y	Y	N	Definitely okay
elife-17589-fig7-v2	TRUE	N	N	N	Definitely problematic
elife-17636-fig10-v3	FALSE				Definitely okay
elife-17681-fig1-v3	TRUE	N	N	N	Definitely problematic
elife-17681-fig6-v4	TRUE	N	N	N	Definitely problematic
elife-17688-fig5-v1	TRUE	Y	N	N	Probably okay	There is some sort of heatmap between green and red, but there are no lables.
elife-17820-fig6-v6	FALSE				Definitely okay
elife-17929-fig2-v4	TRUE	N	N	N	Definitely problematic
elife-17985-fig4-v1	TRUE	N	N	N	Definitely problematic
elife-18017-fig1-v2	TRUE	NA	NA	Y	Definitely okay
elife-18096-fig7-v2	FALSE				Definitely okay
elife-18101-fig3-v1	FALSE				Definitely okay
elife-18126-fig4-v2	TRUE	Y	Y	N	Definitely okay
elife-18129-fig1-v1	TRUE	N	N	N	Definitely problematic
elife-18134-fig6-v2	TRUE	N	N	N	Definitely problematic
elife-18165-fig12-v1	TRUE	N	N	N	Definitely problematic
elife-18227-fig1-v1	TRUE	Y	N	N	Probably okay	In Figure A and B there are many confusing colors near eachother, even though they have enough contrast.
elife-18246-fig4-v1	TRUE	N	N	N	Definitely problematic
elife-18270-fig2-v2	TRUE	Y	N	Y	Definitely okay
elife-18290-fig5-v3	FALSE				Definitely okay
elife-18290-fig7-v3	TRUE	Y	N	Y	Definitely okay
elife-18295-fig7-v3	TRUE	N	N	N	Definitely problematic
elife-18296-fig5-v3	TRUE	Y	N	N	Definitely okay
elife-18318-fig3-v1	FALSE				Definitely okay
elife-18318-fig4-v2	FALSE				Definitely okay
elife-18345-fig7-v2	FALSE				Definitely okay
elife-18370-fig3-v3	TRUE	NA	NA	Y	Definitely okay
elife-18370-fig8-v2	TRUE	Y	N	Y	Definitely okay
elife-18372-fig4-v1	TRUE	N	N	N	Definitely problematic
elife-18414-fig8-v2	FALSE				Definitely okay
elife-18425-fig4-v2	TRUE	Y	Y	N	Definitely okay
elife-18432-fig3-v1	TRUE	Y	Y	N	Definitely okay	Heatmap
elife-18432-fig4-v1	TRUE	Y	Y	N	Definitely okay	Heatmap
elife-18489-fig8-v2	TRUE	N	N	N	Definitely problematic	See Figure E, with lots of overlapping colors
elife-18529-fig4-v2	TRUE	Y	Y	N	Definitely okay
elife-18554-fig3-v1	FALSE				Gray-scale
elife-18566-fig5-v2	TRUE	Y	Y	N	Definitely okay
elife-18591-fig1-v2	TRUE	Y	Y	N	Definitely okay
elife-18605-fig10-v1	TRUE	N	N	N	Definitely problematic
elife-18770-fig3-v3	FALSE				Definitely okay
elife-18825-fig5-v2	TRUE	N	N	N	Definitely problematic
elife-18855-fig1-v2	FALSE				Definitely okay
elife-18857-fig4-v2	FALSE				Definitely okay
elife-18972-fig5-v3	TRUE	Y	N	N	Definitely okay
elife-18981-fig1-v3	TRUE	NA	NA	Y	Definitely okay
elife-19022-fig10-v3	TRUE	Y	N	N	Definitely okay
elife-19027-fig2-v3	TRUE	Y	Y	N	Definitely okay
elife-19089-fig1-v2	TRUE	Y	N	N	Definitely okay
elife-19090-fig7-v2	FALSE				Definitely okay
elife-19095-fig7-v1	FALSE				Definitely okay
elife-19145-fig4-v2	FALSE				Definitely okay
elife-19153-fig8-v3	FALSE				Definitely okay
elife-19157-fig5-v2	TRUE	Y	Y	Y	Definitely okay
elife-19157-fig10-v2	FALSE				Definitely okay
elife-19214-fig5-v1	TRUE	Y	Y	N	Definitely okay	Heat map
elife-19236-fig3-v2	FALSE				Definitely okay
elife-19264-fig4-v2	TRUE	N	N	N	Definitely problematic
elife-19264-fig5-v1	TRUE	N	N	N	Definitely problematic	See Figure I
elife-19273-fig7-v1	FALSE				Gray-scale
elife-19298-fig3-v2	FALSE				Gray-scale
elife-19332-fig4-v2	TRUE	Y	Y	N	Definitely okay	Heat map
elife-19374-fig2-v3	TRUE	Y	Y	Y	Definitely okay
elife-19394-fig6-v3	FALSE				Definitely okay
elife-19394-fig7-v3	FALSE				Gray-scale
elife-19406-fig2-v2	TRUE	N	N	N	Definitely problematic
elife-19466-fig3-v3	FALSE				Definitely okay
elife-19466-fig4-v1	TRUE	Y	Y	Y	Definitely okay
elife-19466-fig9-v2	TRUE	Y	N	N	Definitely okay
elife-19469-fig10-v2	TRUE	Y	Y	Y	Definitely okay
elife-19484-fig4-v2	TRUE	Y	N	Y	Definitely okay
elife-19493-fig5-v1	TRUE	Y	Y	N	Definitely okay
elife-19493-fig6-v1	TRUE	Y	Y	N	Definitely okay
elife-19505-fig1-v1	TRUE	Y	N	N	Probably okay	Many color without a good labeling system makes it hard to tell it apart
elife-19510-fig7-v2	TRUE	Y	Y	Y	Definitely okay
elife-19535-fig5-v1	FALSE				Definitely okay
elife-19573-fig6-v4	FALSE				Definitely okay
elife-19607-fig1-v3	TRUE	Y	Y	Y	Definitely okay
elife-19686-fig10-v1	TRUE	Y	Y	Y	Definitely okay
elife-19706-fig2-v2	TRUE	Y	N	Y	Definitely okay
elife-19720-fig4-v1	TRUE	N	N	N	Definitely problematic
elife-19720-fig6-v1	FALSE				Definitely okay
elife-19755-fig2-v2	TRUE	Y	N	Y	Definitely okay
elife-19755-fig8-v2	TRUE	N	Y	Y	Definitely okay	While there is not enough contrast in Figure B, the label makes it easier to read
elife-19788-fig1-v2	FALSE				Definitely okay
elife-19848-fig1-v2	TRUE	Y	Y	N	Definitely okay	Heat map
elife-19874-fig6-v2	FALSE				Definitely okay
elife-19881-fig7-v2	FALSE				Definitely okay
elife-19891-fig2-v2	FALSE				Definitely okay
elife-19892-fig4-v1	TRUE	Y	N	N	Probably okay	The red in some of the merges seem to disappear
elife-19892-fig7-v1	TRUE	N	N	N	Definitely problematic
elife-19893-fig1-v2	TRUE	Y	N	N	Definitely okay
elife-19942-fig2-v1	TRUE	Y	N	Y	Definitely okay
elife-19942-fig3-v1	TRUE	NA	NA	Y	Definitely okay
elife-19991-fig8-v2	FALSE				Definitely okay
elife-19993-fig1-v3	FALSE				Definitely okay
elife-19993-fig2-v3	FALSE				Definitely okay
elife-20041-fig4-v2	FALSE				Definitely okay
elife-20059-fig1-v2	TRUE	N	N	N	Definitely problematic
elife-20059-fig2-v2	FALSE				Gray-scale
elife-20068-fig2-v2	TRUE	NA	NA	Y	Definitely okay
elife-20147-fig1-v2	TRUE	NA	NA	Y	Definitely okay
elife-20156-fig5-v2	FALSE				Definitely okay
elife-20156-fig11-v1	TRUE	Y	N	N	Definitely okay
elife-20172-fig1-v3	FALSE				Definitely okay
elife-20185-fig4-v2	TRUE	Y	N	N	Definitely okay
elife-20198-fig6-v2	TRUE	Y	N	N	Probably okay	Not much contrast between colors in Figure A
elife-20236-fig5-v1	TRUE	Y	Y	N	Definitely okay
elife-20242-fig1-v2	FALSE				Definitely okay
elife-20253-fig7-v2	TRUE	Y	Y	Y	Definitely okay
elife-20317-fig4-v2	TRUE	NA	NA	Y	Definitely okay
elife-20331-fig2-v2	TRUE	Y	N	N	Definitely okay
elife-20352-fig7-v2	FALSE				Definitely okay
elife-20375-fig2-v3	TRUE	Y	Y	N	Definitely okay	heat map
elife-20383-fig4-v2	FALSE				Definitely okay
elife-20390-fig3-v2	FALSE				Definitely okay
elife-20488-fig1-v1	TRUE	Y	N	Y	Definitely okay
elife-20522-fig7-v1	FALSE				Definitely okay
elife-20527-fig3-v3	TRUE	NA	NA	Y	Definitely okay
elife-20532-fig3-v1	TRUE	Y	N	N	Definitely okay
elife-20533-fig7-v2	FALSE				Gray-scale
elife-20552-fig8-v1	FALSE				Definitely okay
elife-20552-fig9-v2	FALSE				Definitely okay
elife-20600-fig6-v1	TRUE	Y	N	N	Probably problematic	While there enough contrast, there are too many color in close proximity
elife-20621-fig1-v1	TRUE	Y	N	Y	Definitely okay
elife-20695-fig1-v1	TRUE	Y	N	Y	Definitely okay
elife-20721-fig1-v1	FALSE				Definitely okay
elife-20725-fig9-v1	TRUE	Y	Y	Y	Definitely okay
elife-20750-fig4-v2	TRUE	NA	NA	Y	Definitely okay
elife-20782-fig5-v2	TRUE	NA	NA	Y	Definitely okay
elife-20818-fig5-v3	TRUE	Y	N	N	Definitely okay
elife-20851-fig1-v1	TRUE	Y	N	N	Definitely okay
elife-20882-fig7-v1	TRUE	N	Y	Y	Definitely okay
elife-20922-fig8-v1	TRUE	Y	Y	Y	Definitely okay
elife-20934-fig5-v3	TRUE	Y	N	Y	Definitely okay
elife-20937-fig6-v2	FALSE				Definitely okay
elife-20975-fig2-v2	FALSE				Definitely okay
elife-20982-fig6-v2	TRUE	N	N	N	Definitely problematic
elife-20985-fig10-v2	FALSE				Definitely okay
elife-21012-fig2-v3	TRUE	N	N	N	Definitely problematic
elife-21032-fig2-v2	TRUE	N	N	N	Definitely problematic
elife-21036-fig8-v1	TRUE	Y	N	N	Definitely okay
elife-21036-fig9-v1	TRUE	Y	N	Y	Definitely okay
elife-21105-fig3-v2	TRUE	NA	NA	Y	Definitely okay
elife-21126-fig6-v3	TRUE	Y	Y	N	Definitely okay
elife-21130-fig2-v1	TRUE	N	N	N	Definitely problematic
elife-21137-fig2-v1	TRUE	Y	N	N	Probably okay	Figure B the green and orange are too similar
elife-21143-fig6-v3	TRUE	NA	NA	Y	Definitely okay
elife-21166-fig5-v1	FALSE				Definitely okay
elife-21172-fig5-v2	FALSE				Definitely okay
elife-21297-fig5-v2	TRUE	Y	Y	N	Definitely okay
elife-21330-fig4-v2	TRUE	Y	N	N	Definitely okay	Heat map
elife-21470-fig1-v2	FALSE				Gray-scale
[truncated: 2,965 more rows]
